# Supplementary material
Source: HighWire-hosted journal article supplement (https://erj.ersjournals.com/content/50/2/1602139)
Supplement: inline-supplementary-material-1 [file inline-supplementary-material-1.pdf]

### **Supplementary file 1: Searches undertaken for each Key Questions**

This section is divided into key questions (KQ) with the search strategy and results of searches undertaken for each KQ. Data relating to KQs 1-2 were undertaken by AC and JG; KQs 3-5 by JM and PB; part of KQ5 by KP and RC; and KQs 6-7 by KG and MS. The PRISMA diagrams are in Supplementary figures.

#### **KQ1. In children aged $\leq 18$ -years with chronic wet or productive cough unrelated to an underlying disease and without any specific cough pointers (e.g. coughs with feeding, digital clubbing, etc.),**

- a. what is the evidence for PBB in clinical studies and clinical guidelines
- b. what have been used for the symptoms, signs and duration of cough for those with PBB

#### **Search criteria for KQ1**

| <b>Study Characteristic</b> | <b>Inclusion Criteria</b>                                                                                                                                                                                                                                            | <b>Exclusion Criteria</b>                                                                                                             |
|-----------------------------|----------------------------------------------------------------------------------------------------------------------------------------------------------------------------------------------------------------------------------------------------------------------|---------------------------------------------------------------------------------------------------------------------------------------|
| Patient Population          | <ul style="list-style-type: none"><li>• Humans</li><li>• Children with chronic cough (&gt; 4 weeks) with wet or productive cough</li></ul>                                                                                                                           | Adults (aged >14 years)                                                                                                               |
| Index Test                  | <ul style="list-style-type: none"><li>• Antibiotics</li></ul>                                                                                                                                                                                                        | None                                                                                                                                  |
| Comparator                  | <ul style="list-style-type: none"><li>• Placebo or no antibiotics</li></ul>                                                                                                                                                                                          | None                                                                                                                                  |
| Target Condition            | <ul style="list-style-type: none"><li>• Chronic Cough</li></ul>                                                                                                                                                                                                      | Known bronchiectasis or cystic fibrosis                                                                                               |
| Timing                      | <ul style="list-style-type: none"><li>• Timing not limited</li></ul>                                                                                                                                                                                                 | None                                                                                                                                  |
| Setting                     | <ul style="list-style-type: none"><li>• Inpatient and outpatient</li></ul>                                                                                                                                                                                           | None                                                                                                                                  |
| Study design                | <ul style="list-style-type: none"><li>• Evaluation studies</li><li>• Case series</li></ul>                                                                                                                                                                           | <ul style="list-style-type: none"><li>• Not a clinical study (e.g., editorial, non-systematic review, letter to the editor)</li></ul> |
| Publications                | <ul style="list-style-type: none"><li>• English-language only</li><li>• Peer-reviewed articles</li><li>• Relevant systematic review, meta-analysis, or methods article (used only for background and as potential sources of additional relevant material)</li></ul> | <ul style="list-style-type: none"><li>• Non-English-language publications</li></ul>                                                   |

**KQ1 Search for ACCP Systematic review was undertaken on 19<sup>th</sup> July 2015**  
**New search for the below undertaken on 30 Jan 2016**

## Search results for KQ1

### PubMed

((("2015/07/19"[Date - Entrez] : "3000"[Date - Entrez])) AND ("chronic cough" OR "idiopathic cough" OR "refractory cough" OR "unresponsive cough" OR "intractable cough" OR "psychogenic cough" OR "unresolved cough" OR "unexplained cough" OR "wet cough" OR "productive cough") AND (antibiotics OR anti-bacterial agents) *Filters: Humans; English; Child: birth-18 years*

**Results: 20**

### SCOPUS

TITLE-ABS-KEY(("chronic cough" OR "idiopathic cough" OR "refractory cough" OR "unresponsive cough" OR "intractable cough" OR "psychogenic cough" OR "unresolved cough" OR "unexplained cough" OR "wet cough" OR "productive cough") AND (antibiotics OR "anti-bacterial agents") AND (child OR children OR infant OR neonate OR adolescent)) AND ( LIMIT-TO(LANGUAGE,"English" ) ) AND ( LIMIT-TO(PUBYEAR,2016) OR LIMIT-TO(PUBYEAR,2015) )

**Results: 75**

### Cochrane CENTRAL

("chronic cough" OR "idiopathic cough" OR "refractory cough" OR "unresponsive cough" OR "intractable cough" OR "psychogenic cough" OR "unresolved cough" OR "unexplained cough" OR "wet cough" OR "productive cough") AND (antibiotics OR "anti-bacterial agents") AND (child OR children OR infant OR neonate OR adolescent) in Title, Abstract, Keywords. LIMIT 2015 to 2016

**Results: 0**

**KQ2. In children with chronic (>4 weeks) wet or productive with or without other specific cough pointers (e.g clubbing and feeding difficulties), what:**

- are the possible causes
- tests should be undertaken and when should they be referred for further investigations?
- is the risk of harm in cases of delayed treatment and investigations?

Search criteria used for KQ2

| <b>Study Characteristic</b> | <b>Inclusion Criteria</b>                                                                                                                                                                                                                                          | <b>Exclusion Criteria</b>                                                                                                             |
|-----------------------------|--------------------------------------------------------------------------------------------------------------------------------------------------------------------------------------------------------------------------------------------------------------------|---------------------------------------------------------------------------------------------------------------------------------------|
| Patient Population          | <ul style="list-style-type: none"> <li>Humans</li> <li>Children with chronic cough with wet or productive cough</li> </ul>                                                                                                                                         | Adults (aged >14 years)                                                                                                               |
| Index Test                  | <ul style="list-style-type: none"> <li>Investigations or tests</li> <li>Referral</li> <li>Etiologies (this one is not in SR)</li> </ul>                                                                                                                            | None                                                                                                                                  |
| Comparator                  | <ul style="list-style-type: none"> <li>No investigations</li> <li>Non referral</li> </ul>                                                                                                                                                                          | None                                                                                                                                  |
| Target Condition            | <ul style="list-style-type: none"> <li>Chronic cough</li> </ul>                                                                                                                                                                                                    | Known bronchiectasis or cystic fibrosis                                                                                               |
| Timing                      | <ul style="list-style-type: none"> <li>Timing not limited</li> </ul>                                                                                                                                                                                               | None                                                                                                                                  |
| Setting                     | <ul style="list-style-type: none"> <li>Inpatient and outpatient</li> </ul>                                                                                                                                                                                         | None                                                                                                                                  |
| Study design                | <ul style="list-style-type: none"> <li>Evaluation studies</li> <li>case series</li> </ul>                                                                                                                                                                          | <ul style="list-style-type: none"> <li>Not a clinical study (e.g., editorial, non-systematic review, letter to the editor)</li> </ul> |
| Publications                | <ul style="list-style-type: none"> <li>English-language only</li> <li>Peer-reviewed articles</li> <li>Relevant systematic review, meta-analysis, or methods article (used only for background and as potential sources of additional relevant material)</li> </ul> | <ul style="list-style-type: none"> <li>Non-English-language publications</li> </ul>                                                   |

**KQ2 Search for ACCP Systematic review was undertaken on 27<sup>th</sup> July 2015**

**KQ2 Search for the below undertaken on 30 Jan 2016**

**Search results for KQ2**

**PubMed**

((("2015/07/27"[Date - Entrez] : "3000"[Date - Entrez])) AND ("chronic cough" OR "idiopathic cough" OR "refractory cough" OR "unresponsive cough" OR "intractable cough" OR "psychogenic cough" OR "unresolved cough" OR "unexplained cough" OR "wet cough" OR "productive cough" OR (cough AND chronic disease[mh])) AND (diagnostic tests, routine[mh]

OR referral and consultation[mh] OR referral[tiab] OR consultation[tiab] OR decision trees[mh]  
OR clinical pathways[mh] OR investigation\* OR algorithms[mh]) Filters: Humans; English;  
Child: birth-18 years

**Results: 23**

## **SCOPUS**

TITLE-ABS-KEY( ( "chronic cough" OR "idiopathic cough" OR "refractory cough" OR  
"unresponsive cough" OR "intractable cough" OR "psychogenic cough" OR "unresolved  
cough" OR "unexplained cough" OR "wet cough" OR "productive cough" OR ( cough  
AND chronic disease ) ) AND ( "diagnostic tests, routine" OR "routine diagnostic tests" OR  
"referral and consultation" OR referral OR consultation OR "decision trees" OR "clinical  
pathways" OR investigation\* OR algorithm\* ) AND ( child OR children OR infant OR  
neonate OR adolescent ) AND ( human OR humans ) ) AND ( LIMIT-TO ( LANGUAGE ,  
"English" ) ) AND ( LIMIT-TO ( PUBYEAR , 2016 ) OR LIMIT-TO ( PUBYEAR , 2015 ) )

**Results: 313**

## **CENTRAL (Cochrane)**

(( "chronic cough" OR "idiopathic cough" OR "refractory cough" OR "unresponsive cough" OR  
"intractable cough" OR "psychogenic cough" OR "unresolved cough" OR "unexplained cough"  
OR "wet cough" OR "productive cough" OR (cough AND chronic disease)) AND ("diagnostic  
tests, routine" OR "routine diagnostic tests" OR "referral and consultation" OR referral OR  
consultation OR "decision trees" OR "clinical pathways" OR investigation\* OR algorithm\*)  
AND (child OR children OR infant OR neonate OR adolescent)) in Title, Abstract, Keywords  
LIMIT 2015 to 2016

**Results: 0**

## **PBB Search**

### **Pubmed**

("2015/07/27"[EDAT] : "3000"[EDAT]) AND ("protracted bacterial bronchitis"[All Fields] OR  
"persistent bacterial bronchitis"[All Fields]) AND ("children"[All Fields] OR "child"[All Fields])

**Results: 8**

**KQ3: In children with chronic (>4-weeks) wet or productive cough unrelated to an underlying disease and without any specific cough pointers, what bacteria are cultured from the lower airways and the associated airway cellularity?**

Search criteria used for KQ3

| <b>Study Characteristic</b> | <b>Inclusion Criteria</b>                                                                                                                                                                                                                                                | <b>Exclusion Criteria</b>                                                                                                               |
|-----------------------------|--------------------------------------------------------------------------------------------------------------------------------------------------------------------------------------------------------------------------------------------------------------------------|-----------------------------------------------------------------------------------------------------------------------------------------|
| Patient Population          | <ul style="list-style-type: none"> <li>• Humans</li> <li>• Children with chronic cough (&gt; 4 weeks) with wet or productive cough</li> <li>• PBB</li> <li>• Protracted bacterial bronchitis</li> </ul>                                                                  | Adults (aged >18 years)                                                                                                                 |
| Index Test                  | <ul style="list-style-type: none"> <li>• Bacteriology</li> <li>• Bacteria</li> </ul>                                                                                                                                                                                     | None                                                                                                                                    |
| Comparator                  | <ul style="list-style-type: none"> <li>• No bacteriology</li> <li>• No bacteria</li> </ul>                                                                                                                                                                               | None                                                                                                                                    |
| Target Condition            | <ul style="list-style-type: none"> <li>• Chronic Cough</li> </ul>                                                                                                                                                                                                        | Known bronchiectasis or cystic fibrosis                                                                                                 |
| Timing                      | <ul style="list-style-type: none"> <li>• Timing not limited</li> </ul>                                                                                                                                                                                                   | None                                                                                                                                    |
| Setting                     | <ul style="list-style-type: none"> <li>• Inpatient and outpatient</li> </ul>                                                                                                                                                                                             | None                                                                                                                                    |
| Study design                | <ul style="list-style-type: none"> <li>• Evaluation studies</li> <li>• Case series</li> </ul>                                                                                                                                                                            | <ul style="list-style-type: none"> <li>• Not a clinical study (e.g., editorial, non-systematic review, letter to the editor)</li> </ul> |
| Publications                | <ul style="list-style-type: none"> <li>• English-language only</li> <li>• Peer-reviewed articles</li> <li>• Relevant systematic review, meta-analysis, or methods article (used only for background and as potential sources of additional relevant material)</li> </ul> | <ul style="list-style-type: none"> <li>• Non-English-language publications</li> </ul>                                                   |

**Search results for KQ3**

**PubMed**

("chronic cough" OR "idiopathic cough" OR "refractory cough" OR "unresponsive cough" OR "intractable cough" OR "psychogenic cough" OR "unexplained cough" OR "wet cough" OR "productive cough" OR "PBB" OR "Protracted bacterial bronchitis") AND ("bacteriology" OR "bacteria")

*Filters: Humans; English; Child: birth-18 years*

Results: 14

**Web of Science:**

TOPIC: ((chronic cough OR idiopathic cough OR refractory cough OR unresponsive cough OR intractable cough OR psychogenic cough OR unexplained cough OR wet cough OR productive cough OR PBB OR protracted bacterial bronchitis) AND (bacteriology OR bacteria)) AND TOPIC: (child OR children OR adolescent OR infant OR neonate) Refined by: LANGUAGES: ( ENGLISH ) AND DOCUMENT TYPES: ( ARTICLE OR REVIEW OR PROCEEDINGS PAPER )

Results: 284

### **SCOPUS:**

TITLE-ABS-KEY(("chronic cough" OR "idiopathic cough" OR "refractory cough" OR "unresponsive cough" OR "intractable cough" OR "psychogenic cough" OR "unexplained cough" OR "wet cough" OR "productive cough" OR "PBB" OR "protracted bacterial bronchitis") AND ("bacteriology" OR "bacteria") AND (child OR children OR infant OR neonate OR adolescent)) AND ( LIMIT-TO(LANGUAGE,"English" ) )

Results: 108

### **Cochrane CENTRAL**

("chronic cough" OR "idiopathic cough" OR "refractory cough" OR "unresponsive cough" OR "intractable cough" OR "psychogenic cough" OR "unresolved cough" OR "unexplained cough" OR "wet cough" OR "productive cough" OR "PBB" OR "protracted bacterial bronchitis") AND (bacteriology OR "bacteria") AND (child OR children OR infant OR neonate OR adolescent)

Results: 1

**KQ4: In children with PBB, in addition to ‘classical’ bacteriology, what else is known about the airway microbiology (viruses, virus-bacteria interactions, microbiome)?**

KQ4 was also undertaken in parts; (i) virus, (ii) microbiome and interactions.

**KQ4(i): In children aged <18 years with PBB, what is the known microbiology (virus)?**

Search criteria used for KQ4(i)

| <b>Study Characteristic</b> | <b>Inclusion Criteria</b>                                                                                                                                                                                                                                            | <b>Exclusion Criteria</b>                                                                                                             |
|-----------------------------|----------------------------------------------------------------------------------------------------------------------------------------------------------------------------------------------------------------------------------------------------------------------|---------------------------------------------------------------------------------------------------------------------------------------|
| Patient Population          | <ul style="list-style-type: none"><li>• Humans</li><li>• Children with chronic cough (&gt; 4 weeks) with wet or productive cough</li><li>• PBB</li><li>• Protracted bacterial bronchitis</li></ul>                                                                   | Adults (aged >18 years)                                                                                                               |
| Index Test                  | <ul style="list-style-type: none"><li>• Viruses</li></ul>                                                                                                                                                                                                            | None                                                                                                                                  |
| Comparator                  | <ul style="list-style-type: none"><li>• No viruses</li></ul>                                                                                                                                                                                                         | None                                                                                                                                  |
| Target Condition            | <ul style="list-style-type: none"><li>• PBB</li></ul>                                                                                                                                                                                                                | Known bronchiectasis or cystic fibrosis                                                                                               |
| Timing                      | <ul style="list-style-type: none"><li>• Timing not limited</li></ul>                                                                                                                                                                                                 | None                                                                                                                                  |
| Setting                     | <ul style="list-style-type: none"><li>• Inpatient and outpatient</li></ul>                                                                                                                                                                                           | None                                                                                                                                  |
| Study design                | <ul style="list-style-type: none"><li>• Evaluation studies</li><li>• Case series</li></ul>                                                                                                                                                                           | <ul style="list-style-type: none"><li>• Not a clinical study (e.g., editorial, non-systematic review, letter to the editor)</li></ul> |
| Publications                | <ul style="list-style-type: none"><li>• English-language only</li><li>• Peer-reviewed articles</li><li>• Relevant systematic review, meta-analysis, or methods article (used only for background and as potential sources of additional relevant material)</li></ul> | <ul style="list-style-type: none"><li>• Non-English-language publications</li></ul>                                                   |

**Search results for KQ4(i)**

**PubMed**

(“chronic cough” OR “idiopathic cough” OR “refractory cough” OR “unresponsive cough” OR “intractable cough” OR “psychogenic cough” OR “unresolved cough” OR “unexplained cough” OR “wet cough” OR “productive cough” OR “PBB” OR “protracted bacterial bronchitis”) AND

("viruses" OR "virus")

*Filters: Humans; English; Child: birth-18 years*

Results: 17

**Web of Science:**

TOPIC: ((chronic cough OR idiopathic cough OR refractory cough OR unresponsive cough OR intractable cough OR psychogenic cough OR unresolved cough OR unexplained cough OR wet cough OR productive cough) AND (virus OR viruses)) AND TOPIC: (child OR children OR adolescent OR infant OR neonate) Refined by: LANGUAGES: ( ENGLISH ) AND DOCUMENT TYPES: ( ARTICLE OR REVIEW OR PROCEEDINGS PAPER )

Results: 92

**SCOPUS:**

TITLE-ABS-KEY(("chronic cough" OR "idiopathic cough" OR "refractory cough" OR "unresponsive cough" OR "intractable cough" OR "psychogenic cough" OR "unresolved cough" OR "unexplained cough" OR "wet cough" OR "productive cough") AND ( "viruses" OR "virus" ) AND (child OR children OR infant OR neonate OR adolescent)) AND ( LIMIT-TO(LANGUAGE,"English" ) )

Results: 103

**Cochrane CENTRAL**

("chronic cough" OR "idiopathic cough" OR "refractory cough" OR "unresponsive cough" OR "intractable cough" OR "psychogenic cough" OR "unresolved cough" OR "unexplained cough" OR "wet cough" OR "productive cough") AND ("viruses" OR "virus") AND (child OR children OR infant OR neonate OR adolescent)

Results: 1



**KQ4(ii): In children aged <18 years with PBB, what is the known microbiology (microbiome and interactions)?**

Search criteria used for KQ4(ii)

| <b>Study Characteristic</b> | <b>Inclusion Criteria</b>                                                                                                                                                                                                                                                | <b>Exclusion Criteria</b>                                                                                                               |
|-----------------------------|--------------------------------------------------------------------------------------------------------------------------------------------------------------------------------------------------------------------------------------------------------------------------|-----------------------------------------------------------------------------------------------------------------------------------------|
| Patient Population          | <ul style="list-style-type: none"> <li>• Humans</li> <li>• Children with chronic cough (&gt; 4 weeks) with wet or productive cough</li> <li>• PBB</li> <li>• Protracted bacterial bronchitis</li> </ul>                                                                  | Adults (aged >18 years)                                                                                                                 |
| Index Test                  | <ul style="list-style-type: none"> <li>• Microbiology</li> <li>• Microbiota</li> <li>• Microbiome</li> <li>• Biofilm</li> </ul>                                                                                                                                          | None                                                                                                                                    |
| Comparator                  | <ul style="list-style-type: none"> <li>• No microbiology</li> </ul>                                                                                                                                                                                                      | None                                                                                                                                    |
| Target Condition            | <ul style="list-style-type: none"> <li>• PBB</li> </ul>                                                                                                                                                                                                                  | Known bronchiectasis or cystic fibrosis                                                                                                 |
| Timing                      | <ul style="list-style-type: none"> <li>• Timing not limited</li> </ul>                                                                                                                                                                                                   | None                                                                                                                                    |
| Setting                     | <ul style="list-style-type: none"> <li>• Inpatient and outpatient</li> </ul>                                                                                                                                                                                             | None                                                                                                                                    |
| Study design                | <ul style="list-style-type: none"> <li>• Evaluation studies</li> <li>• Case series</li> </ul>                                                                                                                                                                            | <ul style="list-style-type: none"> <li>• Not a clinical study (e.g., editorial, non-systematic review, letter to the editor)</li> </ul> |
| Publications                | <ul style="list-style-type: none"> <li>• English-language only</li> <li>• Peer-reviewed articles</li> <li>• Relevant systematic review, meta-analysis, or methods article (used only for background and as potential sources of additional relevant material)</li> </ul> | <ul style="list-style-type: none"> <li>• Non-English-language publications</li> </ul>                                                   |

**Search results for KQ4(ii)**

**PubMed**

("chronic cough" OR "unresponsive cough" OR "refractory cough" OR "intractable cough" OR "psychogenic cough" OR "unexplained cough" OR "wet cough" OR "productive cough" OR "PBB" OR "protracted bacterial bronchitis") AND ("microbiology" OR "microbiota" OR "microbiome" OR "biofilm")

*Filters: Humans; English; Child: birth-18 years*

*Results: 53*

**Web of Science:**

TOPIC: ((chronic cough OR idiopathic cough OR refractory cough OR unresponsive cough OR intractable cough OR psychogenic cough OR unresolved cough OR unexplained cough OR wet cough OR productive cough OR PBB OR protracted bacterial bronchitis) AND (microbiology OR microbiota OR microbiome OR biofilm)) AND TOPIC: (child OR children OR adolescent OR infant OR neonate) Refined by: LANGUAGES: ( ENGLISH ) AND DOCUMENT TYPES: ( ARTICLE OR REVIEW OR PROCEEDINGS PAPER )

Results: 14

**SCOPUS:**

TITLE-ABS-KEY(("chronic cough" OR "idiopathic cough" OR "refractory cough" OR "unresponsive cough" OR "intractable cough" OR "psychogenic cough" OR "unresolved cough" OR "unexplained cough" OR "wet cough" OR "productive cough" OR "PBB" OR "protracted bacterial bronchitis") AND ("microbiology" OR "microbiota" OR "microbiome" OR "biofilm") AND (child OR children OR infant OR neonate OR adolescent)) AND ( LIMIT-TO(LANGUAGE,"English" ) )

Results: 48

**Cochrane CENTRAL**

("chronic cough" OR "idiopathic cough" OR "refractory cough" OR "unresponsive cough" OR "intractable cough" OR "psychogenic cough" OR "unresolved cough" OR "unexplained cough" OR "wet cough" OR "productive cough" OR "PBB" OR "protracted bacterial bronchitis") AND ("microbiology" OR "microbiota" OR "microbiome" OR "biofilm") AND (child OR children OR infant OR neonate OR adolescent)

Results: 1

**KQ5. In children aged <18 years with PBB, what are the known pathobiology (risk factors, underlying mechanisms, cellular pathways, immunity, airway malacia)?**

KQ5 was also undertaken in parts; (i) focused on **risk factors, underlying mechanisms, cellular pathways, immunity**; (ii) focused on airway malacia.

**KQ5(i). In children aged <18 years with PBB, what are the known pathobiology (risk factors, underlying mechanisms, cellular pathways, immunity**

Search criteria used for KQ5(i)

| <b>Study Characteristic</b> | <b>Inclusion Criteria</b>                                                                                                                                                                                                                                                | <b>Exclusion Criteria</b>                                                                                                               |
|-----------------------------|--------------------------------------------------------------------------------------------------------------------------------------------------------------------------------------------------------------------------------------------------------------------------|-----------------------------------------------------------------------------------------------------------------------------------------|
| Patient Population          | <ul style="list-style-type: none"> <li>• Humans</li> <li>• Children with chronic cough (&gt; 4 weeks) with wet or productive cough</li> <li>• PBB</li> <li>• Protracted bacterial bronchitis</li> </ul>                                                                  | Adults (aged >18 years)                                                                                                                 |
| Index Test                  | <ul style="list-style-type: none"> <li>• Pathobiology</li> <li>• Immunity</li> <li>• Innate immunity</li> <li>• Risk factors</li> <li>• Signaling pathways</li> <li>• Cellular pathways</li> <li>• Inflammation</li> </ul>                                               | None                                                                                                                                    |
| Comparator                  | <ul style="list-style-type: none"> <li>• No pathobiology</li> </ul>                                                                                                                                                                                                      | None                                                                                                                                    |
| Target Condition            | <ul style="list-style-type: none"> <li>• PBB</li> </ul>                                                                                                                                                                                                                  | Known bronchiectasis or cystic fibrosis                                                                                                 |
| Timing                      | <ul style="list-style-type: none"> <li>• Timing not limited</li> </ul>                                                                                                                                                                                                   | None                                                                                                                                    |
| Setting                     | <ul style="list-style-type: none"> <li>• Inpatient and outpatient</li> </ul>                                                                                                                                                                                             | None                                                                                                                                    |
| Study design                | <ul style="list-style-type: none"> <li>• Evaluation studies</li> <li>• Case series</li> </ul>                                                                                                                                                                            | <ul style="list-style-type: none"> <li>• Not a clinical study (e.g., editorial, non-systematic review, letter to the editor)</li> </ul> |
| Publications                | <ul style="list-style-type: none"> <li>• English-language only</li> <li>• Peer-reviewed articles</li> <li>• Relevant systematic review, meta-analysis, or methods article (used only for background and as potential sources of additional relevant material)</li> </ul> | <ul style="list-style-type: none"> <li>• Non-English-language publications</li> </ul>                                                   |

## Search results for KQ5(i)

### PubMed

("chronic cough" OR "idiopathic cough" OR "refractory cough" OR "unresponsive cough" OR "intractable cough" OR "psychogenic cough" OR "unresolved cough" OR "unexplained cough" OR "wet cough" OR "productive cough" OR "PBB" OR "protracted bacterial bronchitis") AND ("pathobiology" OR "immunity" OR "innate immunity" OR "risk factors" OR "signalling pathways" OR "cellular pathways")

*Filters: Humans; English; Child: birth-18 years*

*Results: 145*

### Web of Science:

TOPIC: ((chronic cough OR idiopathic cough OR refractory cough OR unresponsive cough OR intractable cough OR psychogenic cough OR unresolved cough OR unexplained cough OR wet cough OR productive cough OR PBB OR protracted bacterial bronchitis) AND (pathobiology OR immunity OR Innate immunity OR risk factors OR signalling pathways OR cellular pathway)) AND TOPIC: (child OR children OR adolescent OR infant OR neonate) Refined by: LANGUAGES: ( ENGLISH ) AND DOCUMENT TYPES: ( ARTICLE OR REVIEW OR PROCEEDINGS PAPER )

Results: 157

**SCOPUS:** TITLE-ABS-KEY(("chronic cough" OR "idiopathic cough" OR "refractory cough" OR "unresponsive cough" OR "intractable cough" OR "psychogenic cough" OR "unresolved cough" OR "unexplained cough" OR "wet cough" OR "productive cough" OR "PBB" OR "protracted bacterial bronchitis") AND ("pathobiology" OR "immunity" OR "innate immunity" OR "risk factors" OR "signalling pathways" OR "cellular pathway") AND (child OR children OR infant OR neonate OR adolescent)) AND ( LIMIT-TO(LANGUAGE,"English" ) )

Results: 236

### Cochrane CENTRAL

("chronic cough" OR "idiopathic cough" OR "refractory cough" OR "unresponsive cough" OR "intractable cough" OR "psychogenic cough" OR "unresolved cough" OR "unexplained cough" OR "wet cough" OR "productive cough" OR "PBB" OR "protracted bacterial bronchitis") AND (("pathobiology" OR "immunity" OR "innate immunity" OR "risk factors" OR "signalling pathways" OR "cellular pathway") AND (child OR children OR infant OR neonate OR adolescent))

Results: 0

**KQ5(ii). In children aged <18 years with PBB, what are the known pathobiology (airway malacia)?**

Search criteria used for KQ5(ii)

| <b>Study Characteristic</b> | <b>Inclusion Criteria</b>                                                                                                                                                                                                                                                | <b>Exclusion Criteria</b>                                                                                                               |
|-----------------------------|--------------------------------------------------------------------------------------------------------------------------------------------------------------------------------------------------------------------------------------------------------------------------|-----------------------------------------------------------------------------------------------------------------------------------------|
| Patient Population          | <ul style="list-style-type: none"> <li>• Humans</li> <li>• Children with chronic cough (&gt; 4 weeks) with wet or productive cough</li> <li>• PBB</li> <li>• Protracted bacterial bronchitis</li> </ul>                                                                  | Adults (aged >18 years)                                                                                                                 |
| Index Test                  | <ul style="list-style-type: none"> <li>• Airway malacia</li> <li>• Airway lesion/s</li> <li>• Tracheomalacia</li> <li>• Bronchomalacia</li> </ul>                                                                                                                        | None                                                                                                                                    |
| Comparator                  | <ul style="list-style-type: none"> <li>• No airway malacia</li> <li>• No airway lesions</li> <li>• No tracheomalacia</li> <li>• No bronchomalacia</li> </ul>                                                                                                             | None                                                                                                                                    |
| Target Condition            | <ul style="list-style-type: none"> <li>• PBB</li> </ul>                                                                                                                                                                                                                  | Known bronchiectasis or cystic fibrosis                                                                                                 |
| Timing                      | <ul style="list-style-type: none"> <li>• Timing not limited</li> </ul>                                                                                                                                                                                                   | None                                                                                                                                    |
| Setting                     | <ul style="list-style-type: none"> <li>• Inpatient and outpatient</li> </ul>                                                                                                                                                                                             | None                                                                                                                                    |
| Study design                | <ul style="list-style-type: none"> <li>• Evaluation studies</li> <li>• Case series</li> </ul>                                                                                                                                                                            | <ul style="list-style-type: none"> <li>• Not a clinical study (e.g., editorial, non-systematic review, letter to the editor)</li> </ul> |
| Publications                | <ul style="list-style-type: none"> <li>• English-language only</li> <li>• Peer-reviewed articles</li> <li>• Relevant systematic review, meta-analysis, or methods article (used only for background and as potential sources of additional relevant material)</li> </ul> | <ul style="list-style-type: none"> <li>• Non-English-language publications</li> </ul>                                                   |

**Search results for KQ5(iii)**

**PubMed**

("chronic cough" OR "unresponsive cough" OR "refractory cough" OR "intractable cough" OR "psychogenic cough" OR "unresolved cough" OR "unexplained cough" OR "wet cough" OR "productive cough" OR "PBB" OR "protracted bacterial bronchitis") AND ("airway malacia"

OR “ airway lesions” OR “airway lesion” OR “tracheomalacia” OR “bronchomalacia”)

*Filters: Humans; English; Child: birth-18 years*

Results: 11

### **Web of Science:**

TOPIC: ((chronic cough OR idiopathic cough OR refractory cough OR unresponsive cough OR intractable cough OR psychogenic cough OR unresolved cough OR unexplained cough OR wet cough OR productive cough OR PBB OR protracted bacterial bronchitis) AND (airway malacia OR airway lesions OR airway lesion OR tracheomalacia OR bronchomalacia)) AND TOPIC:

(child OR children OR adolescent OR infant OR neonate) Refined by: LANGUAGES: ( ENGLISH ) AND DOCUMENT TYPES: ( ARTICLE OR REVIEW OR PROCEEDINGS PAPER )

Results: 33

### **SCOPUS:**

TITLE-ABS-KEY(("chronic cough" OR "idiopathic cough" OR "refractory cough" OR "unresponsive cough" OR "intractable cough" OR "psychogenic cough" OR "unresolved cough" OR "unexplained cough" OR "wet cough" OR "productive cough" OR "PBB" OR "protracted bacterial bronchitis") AND ("airway malacia" OR "airway lesions" OR "airway lesion" OR "tracheomalacia" OR "bronchomalacia") AND (child OR children OR infant OR neonate OR adolescent)) AND ( LIMIT-TO(LANGUAGE,"English" ) )

Results: 24

### **Cochrane CENTRAL**

("chronic cough" OR "idiopathic cough" OR "refractory cough" OR "unresponsive cough" OR "intractable cough" OR "psychogenic cough" OR "unresolved cough" OR "unexplained cough" OR "wet cough" OR "productive cough" OR "PBB" OR "protracted bacterial bronchitis") AND ("airway malacia" OR "airway lesions" OR "airway lesion" OR "tracheomalacia" OR "bronchomalacia") AND (child OR children OR infant OR neonate OR adolescent)

Results: 1

**KQ6: In children aged ≤18-years with chronic wet or productive cough unrelated to an underlying disease and without any specific cough pointers (e.g. coughing with feeding, digital clubbing, etc.):**

- a. How effective are antibiotics in improving clinical outcomes (eg. cough resolution)?
- b. What is the most suitable antibiotic?
- c. For how long should antibiotics be prescribed?
- d. Does treatment dose and duration influence risk of recurrence in the following 12-months?

Search criteria used for KQ6

| Study Characteristic | Inclusion Criteria                                                                                                                                                                                                                                                 | Exclusion Criteria                                                                                                                    |
|----------------------|--------------------------------------------------------------------------------------------------------------------------------------------------------------------------------------------------------------------------------------------------------------------|---------------------------------------------------------------------------------------------------------------------------------------|
| Patient Population   | <ul style="list-style-type: none"> <li>Humans</li> <li>Children with chronic cough (&gt;4-weeks) with wet or productive cough</li> </ul>                                                                                                                           | Adults (aged >18-years)                                                                                                               |
| Index Test           | <ul style="list-style-type: none"> <li>Antibiotics</li> </ul>                                                                                                                                                                                                      | None                                                                                                                                  |
| Comparator           | <ul style="list-style-type: none"> <li>Placebo or no antibiotics</li> </ul>                                                                                                                                                                                        | None                                                                                                                                  |
| Target Condition     | <ul style="list-style-type: none"> <li>Chronic cough</li> </ul>                                                                                                                                                                                                    | Known bronchiectasis or cystic fibrosis                                                                                               |
| Timing               | <ul style="list-style-type: none"> <li>Timing not limited</li> </ul>                                                                                                                                                                                               | None                                                                                                                                  |
| Setting              | <ul style="list-style-type: none"> <li>Inpatient and outpatient</li> </ul>                                                                                                                                                                                         | None                                                                                                                                  |
| Study design         | <ul style="list-style-type: none"> <li>Evaluation studies</li> <li>Case series</li> </ul>                                                                                                                                                                          | <ul style="list-style-type: none"> <li>Not a clinical study (e.g., editorial, non-systematic review, letter to the editor)</li> </ul> |
| Publications         | <ul style="list-style-type: none"> <li>English-language only</li> <li>Peer-reviewed articles</li> <li>Relevant systematic review, meta-analysis, or methods article (used only for background and as potential sources of additional relevant material)</li> </ul> | <ul style="list-style-type: none"> <li>Non-English-language publications</li> </ul>                                                   |

**Search undertaken on 1 April 2016**

"chronic cough" OR "idiopathic cough" OR "refractory cough" OR "unresponsive cough" OR "intractable cough" OR "psychogenic cough" OR "unresolved cough" OR "unexplained cough" OR "wet cough" OR "productive cough" OR "moist cough" AND antibiotic\* OR "anti-bacterial agent\*" OR "anti-microbial agent\*" AND child\* OR infant\* OR adolescent\*. Filters:

**LANGUAGE:** (English), Human

## Search results for KQ6

### **PubMed**

Results: 75

### **Scopus**

Results: 92 (1 duplicate)

### **Medline (EbscoHost)**

Results: 50

### **Web of Science**

Results: 64 (1 duplicate)

### **Cochrane CENTRAL**

Results: 20

### **Searching reference lists of identified articles**

Results: 17



**KQ7: In children aged ≤18-years with chronic wet or productive cough unrelated to an underlying disease and without any specific cough pointers (e.g. coughing with feeding, digital clubbing, etc.):**

- a. What is the role of prophylactic antibiotics?
- b. What is the risk of antibiotic resistance?
- c. How should recurrences be managed?

Search criteria used for KQ7

| Study Characteristic | Inclusion Criteria                                                                                                                                                                                                                                                 | Exclusion Criteria                                                                                                                    |
|----------------------|--------------------------------------------------------------------------------------------------------------------------------------------------------------------------------------------------------------------------------------------------------------------|---------------------------------------------------------------------------------------------------------------------------------------|
| Patient Population   | <ul style="list-style-type: none"> <li>Humans</li> <li>Children with chronic cough with wet or productive cough</li> </ul>                                                                                                                                         | Adults (aged >18-years)                                                                                                               |
| Index Test           | <ul style="list-style-type: none"> <li>Antibiotics</li> </ul>                                                                                                                                                                                                      | None                                                                                                                                  |
| Comparator           | <ul style="list-style-type: none"> <li>Placebo or no antibiotics</li> </ul>                                                                                                                                                                                        | None                                                                                                                                  |
| Target Condition     | <ul style="list-style-type: none"> <li>Chronic cough</li> </ul>                                                                                                                                                                                                    | Known bronchiectasis or cystic fibrosis                                                                                               |
| Timing               | <ul style="list-style-type: none"> <li>Timing not limited</li> </ul>                                                                                                                                                                                               | None                                                                                                                                  |
| Setting              | <ul style="list-style-type: none"> <li>Inpatient and outpatient</li> </ul>                                                                                                                                                                                         | None                                                                                                                                  |
| Study design         | <ul style="list-style-type: none"> <li>Evaluation studies</li> <li>case series</li> </ul>                                                                                                                                                                          | <ul style="list-style-type: none"> <li>Not a clinical study (e.g., editorial, non-systematic review, letter to the editor)</li> </ul> |
| Publications         | <ul style="list-style-type: none"> <li>English-language only</li> <li>Peer-reviewed articles</li> <li>Relevant systematic review, meta-analysis, or methods article (used only for background and as potential sources of additional relevant material)</li> </ul> | <ul style="list-style-type: none"> <li>Non-English-language publications</li> </ul>                                                   |

**Search undertaken on 1 April 2016**

"chronic cough" OR "idiopathic cough" OR "refractory cough" OR "unresponsive cough" OR "intractable cough" OR "psychogenic cough" OR "unresolved cough" OR "unexplained cough" OR "wet cough" OR "productive cough" OR "moist cough" AND antibiotic\* OR "anti-bacterial agent\*" OR "anti-microbial agent\*" AND child\* OR infant\* OR adolescent\*. Filters:

**LANGUAGE:** (English), Human

**Search results for KQ7**

**PubMed**

Results: 75

**Scopus**

Results: 92 (1 duplicate)

**Medline (EbscoHost)**

Results: 50

**Web of Science**

Results: 64 (1 duplicate)

**Cochrane CENTRAL**

Results: 20

**Searching reference lists of identified articles**

Results: 17
