# Supplementary material
Source: HighWire-hosted journal article supplement (https://erj.ersjournals.com/content/50/2/1602139)
Supplement: inline-supplementary-material-3 [file inline-supplementary-material-3.pdf]

**Supplement Table S1.1a**

**Prospective studies on children with chronic wet cough that included management (diagnosis and Rx) outlining the evidence for presence of PBB (part KQ 1)** [modified with permission from Chest 20016;149:120-42,{6008} Chest 2016;149:106-19{5954} and Pediatric Pulmonology 2016{5970}]

Abbreviations for all tables are in the footnote of the last table

| 1 <sup>st</sup> author, publication year; country | Setting ; Study design               | Inclusion criteria; Exclusion or definitions                                 | N enrolled, N completed; Follow-up length; Age                                                 | Main aim(s) of study                                                                                                            | Primary findings relating to KQ                                                                                                                               | Proportion with PBB <sup>A</sup> in cohort; Definition used; Symptoms and signs                                                                           | Duration of cough; other comment                                                                                               |
|---------------------------------------------------|--------------------------------------|------------------------------------------------------------------------------|------------------------------------------------------------------------------------------------|---------------------------------------------------------------------------------------------------------------------------------|---------------------------------------------------------------------------------------------------------------------------------------------------------------|-----------------------------------------------------------------------------------------------------------------------------------------------------------|--------------------------------------------------------------------------------------------------------------------------------|
| Asilsoy,{4030} 2008 Turkey                        | Single center, Pediatric OPD; cohort | >4 w cough; Exc: NR                                                          | N=108, N completed=108 FU:NR<br>Mean age=8.4 y range 6-14                                      | “evaluate children with cough in accordance with the 2006 ACCP guidelines”{4030}                                                | 56 had wet cough: BE=3; 36 treated 10 d with clarithromycin =PBB=25. Of 56 post AB Rx, 14 had subsequent dry cough and 10 treated with inhaled corticosteroid | 23%; Chronic (>4 w) moist cough and resolution of cough within 2-4 w with clarithromycin, (15 mg/kg/d) for 10 d; Wet cough; signs not described           | Not described for PBB grp; mean duration of entire cohort=4.2 mo SD 4.9<br>Unclear what were outcomes of others with wet cough |
| Chang{5797} 2015 Australia <sup>@</sup>           | Multi-center, Resp OPD; cohort       | Aged <18 years >4 w cough newly referred<br>Exc: chronic respiratory illness | N of cohort=346, N completed=326; Follow-up=12 mo for Dx, 6 mo post Dx<br>Mean age=4.5 y, SD 3 | In children newly referred for chronic cough, to describe data relating specific cough pointers of the 3 most common etiologies | In those with wet cough, OR of 73.7 (95%CI 10, 544.2) for finding an etiology where ABs was effective                                                         | 42%; Resolution of wet cough resolved with 2 w of amox-clav;<br>Of 138 with PBB, wet cough=100%, exertional dyspnea=3.5%; creps=1.4%; hyperinflation=1.4% | Median=20 w (IQR 10-40)<br><br>Likelihood ratios, sensitivity, specificity of the different symptoms/signs presented           |
| Darelid{2263} 1993 Sweden                         | 3 centers Pediatric                  | Aged 0.5-6 y, persistent cough >10 d.                                        | N cohort=88; N completed=87# FU=3 mo;                                                          | Whether 7 d of erythromycin clinically                                                                                          | 88% cured (d 7) in erythromycin group vs. 36% in controls                                                                                                     | Cohort was not called PBB;<br>All with cough,                                                                                                             | Study included as 50% had a cough                                                                                              |

|                                   |                                                                    |                                                                                                                                                                      |                                                                                 |                                                                                                                                                                           |                                                                                                                                                                                                                                                                                                             |                                                                                                                                                                                                               |                                                                                                                                                                                                            |
|-----------------------------------|--------------------------------------------------------------------|----------------------------------------------------------------------------------------------------------------------------------------------------------------------|---------------------------------------------------------------------------------|---------------------------------------------------------------------------------------------------------------------------------------------------------------------------|-------------------------------------------------------------------------------------------------------------------------------------------------------------------------------------------------------------------------------------------------------------------------------------------------------------|---------------------------------------------------------------------------------------------------------------------------------------------------------------------------------------------------------------|------------------------------------------------------------------------------------------------------------------------------------------------------------------------------------------------------------|
|                                   | c OPD;<br>open<br>RCT                                              | Exc: acute<br>otitis media,<br>pneumonia,<br>allergy,<br>tonsillitis,<br>cardiac dis,<br>suspected<br>pertussis                                                      | Median age<br>group=13-24 mo<br>(IQR NR)                                        | improves<br>children 0.5-6y<br>of age with a<br>cough <sup>+</sup> >10 d                                                                                                  | (p<0.006)                                                                                                                                                                                                                                                                                                   | <sup>+</sup> vomiting or cough<br>night attacks=34%,<br>not eating or playing<br>as usual=61%,<br><sup>+</sup> bronchial secretions<br>noises=20%,<br>wheeze=5%<br>( <sup>+</sup> as described by<br>authors) | >21 d. Authors<br>confirmed that the<br>cough was wet (as<br>in Cochrane<br>review{2752}).                                                                                                                 |
| Gedik{606<br>2}, 2015,<br>Turkey  | Single<br>center,<br>pediatric<br>or<br>Allergy<br>dept;<br>Cohort | Aged < 17 y,<br>persistent<br>cough >4 w.<br>Exc: known<br>chronic resp,<br>neuromuscul<br>ar, growth, or<br>cardiac<br>problems,<br>syndromes,<br>or<br>prematurity | N=563,<br>N completed=563<br>FU:NR<br>Mean age=5.4 SD<br>3.8                    | The evaluation<br>of children with<br>chronic cough<br>and aged-based<br>etiological<br>factors                                                                           | 85 children had wet<br>cough and all<br>underwent FB. Amox-<br>clav (2-4 w) given to<br>81. Cough resolved in<br>67 (78.8%), and<br>changed from wet to<br>dry in remaining 14<br>who were then Rx with<br>ICS with resolution of<br>the cough. Remaining<br>children: vascular ring<br>(n=1) and TBM (n=3) | 11.9% of cohort;<br>Chronic wet cough,<br>with and resolution of<br>the cough to ABs<br>within 2–4 w;<br>By definition, no other<br>symptoms or signs<br>present                                              | Not described for<br>PBB grp; mean<br>duration of entire<br>cohort 2.8 ± 2.7<br>mo; Other<br>aetiology found in<br>those with cough<br>pointers{5954}<br>based on clinical<br>findings and CXR<br>changes. |
| Gottfard{<br>1877} 1994<br>Sweden | 3<br>centers<br>Pediatric<br>OPD;<br>DB<br>RCT                     | Lower resp<br>tract infection<br>with cough<br>>10 d, >11<br>coughing<br>attacks in 24<br>hours.<br>Exc:<br>pneumonia,<br>acute otitis<br>media,                     | N cohort=52;<br>N completed=52#<br>FU=14 d; Median<br>age=2.6-2.7 y<br>(IQR NR) | “To investigate<br>the<br>nasopharyngeal<br>flora of children<br>with persistent<br>cough and the<br>effects of Rx<br>with amoxil-<br>clavulanate”<br><sup>+</sup> {1877} | “AB treated group had<br>significantly better<br>recovery in both in both<br>the pediatricians<br>estimation (p=0.02) and<br>independent parental<br>judgement<br>(p=0.002)”{1877}                                                                                                                          | Cohort was not called<br>PBB;<br>A composite score<br>that included post-<br>tussive vomiting,<br>crepitations and rales<br>was used but<br>proportion with other<br>symptoms and signs<br>were not reported  | Mean duration of<br>cough was 3-4<br>weeks (spread NR).<br>Authors confirmed<br>that the cough was<br>wet (as in<br>Cochrane<br>review{2752}).                                                             |

|                                       |                                        | clinical suspicion of pertussis                                                 |                                                                                  |                                                                                                                                              |                                                                                                                              |                                                                                                                                                                                                                                                                                                                     |                                                                                              |
|---------------------------------------|----------------------------------------|---------------------------------------------------------------------------------|----------------------------------------------------------------------------------|----------------------------------------------------------------------------------------------------------------------------------------------|------------------------------------------------------------------------------------------------------------------------------|---------------------------------------------------------------------------------------------------------------------------------------------------------------------------------------------------------------------------------------------------------------------------------------------------------------------|----------------------------------------------------------------------------------------------|
| <b>Karabel{5644} 2014 Turkey</b>      | Single center, Resp OPD; cohort        | >4 w cough<br>Exc: Nuromuscular, cardiac, syndromes, Resp infection in last 4 w | N cohort=270, N completed=270, FU=12 mo<br>Mean age=6.5 y<br>range 7 mo-17 y     | To determine the etiology of chronic cough in children using the ACCP guidelines                                                             | Children Dx with PBB when cough resolved with 2 w of clarithromycin                                                          | 6%;<br>“regression of sputum cough after 15 mg/kg/d clarithromycin”{5444} for 10 d;<br>other symptoms and signs not mentioned                                                                                                                                                                                       | Duration of cough in cohort was not reported                                                 |
| <b>Marchant {3095} 2006 Australia</b> | Single center, Resp OPD, cohort        | >3 w cough, age <18 y and newly referred<br>Exc: known chronic dis              | N cohort=108; N completed=103<br>FU=12 mo;<br>Median age=2.6 yr<br>(IQR 1.2-6.9) | In children with chronic cough, to; (a) evaluate the use of an adult-based algorithmic approach in the management, (b) describe the etiology | Cough resolved in 43 in cohort with chronic wet cough treated with 2 w of amox-clav (termed protracted bacterial bronchitis) | 42%;<br>PBB=chronic moist cough, positive BAL culture ( $10^5$ cfu/ml), and resolution to ABs within 2 w; Probable PBB=chronic moist cough and either positive BAL culture ( $10^3$ or $4$ cfu/ml) or response to ABs (cough resolution within 2 w);<br>Wet cough only (no other symptoms), none had abnormal signs | Not described for PBB grp; median duration of entire cohort=6 mo (IQR 3 to 12)               |
| <b>Marchant {5280} 2012 Australia</b> | Single center, Pediatric and resp OPD; | Aged 0.5-18 y, doctor observed wet cough >3 w;<br>Exc: chronic lung, cardiac    | N cohort=50, N completed=47<br>FU=2 w<br>Mean=1.8-2.8 y<br>IQR=0.9-5.3           | Efficacy of 2 w of oral amoxil-clav (compared with placebo) in achieving cough resolution in                                                 | Amoxil-clav effective for wet cough: Cough resolution rates (48%) in amox-clav group vs placebo (16%), $p=0.016$             | Of the 50 children, FB performed in 37 and all BAL consistent with PBB;<br>Wet cough only (no other symptoms),                                                                                                                                                                                                      | Median cough duration in amox-clav arm=15 (IQR 8.5-59) w, placebo=11 (4-28); BAL in subgroup |

|                                   |                                                             |                                                                                                                                                                                               |                                                                                                            |                                                                                                                                        |                                                              |                                                                                                                                                                                                                                      |                                                                                                                                                                                                                                                                                        |
|-----------------------------------|-------------------------------------------------------------|-----------------------------------------------------------------------------------------------------------------------------------------------------------------------------------------------|------------------------------------------------------------------------------------------------------------|----------------------------------------------------------------------------------------------------------------------------------------|--------------------------------------------------------------|--------------------------------------------------------------------------------------------------------------------------------------------------------------------------------------------------------------------------------------|----------------------------------------------------------------------------------------------------------------------------------------------------------------------------------------------------------------------------------------------------------------------------------------|
|                                   | DB<br>RCT                                                   | neuro-<br>development<br>dis, ABs in<br>last 2 w,<br>acutely<br>unwell                                                                                                                        |                                                                                                            | children with<br>chronic wet<br>cough                                                                                                  |                                                              | none had abnormal<br>signs                                                                                                                                                                                                           | (n=37) indicate<br>PBB                                                                                                                                                                                                                                                                 |
| Usta,{5929<br>}<br>2014<br>Turkey | Single<br>center,<br>pediatric<br>allergy<br>OPD;<br>cohort | Inclusion:<br>NR<br>Exc: cardiac<br>or chronic<br>dis,<br>prematurity,<br>neuro-<br>development,<br>, chest wall<br>deformity,<br>smoking,<br>clubbing,<br>unable to<br>perform<br>spirometry | N cohort=156,<br>N<br>completed=156,<br>FU=max 18 mo<br>for Dx, NR post<br>Dx; Mean<br>age=8.4 y<br>SD 2.6 | “Evaluate<br>assessment and<br>Mx of chronic<br>cough in<br>children<br>according to the<br>British Thoracic<br>Society<br>guidelines” | Most common<br>diagnosis was “post<br>nasal drip” and asthma | 12% of cohort; 19 of<br>the 23 (82.6%) of<br>those with wet cough<br>had PBB;<br>Isolated chronic<br>productive cough that<br>resolves within 2 w of<br>clarithromycin (15<br>mg/kg/d);<br>Other symptoms and<br>signs not mentioned | Not described for<br>PBB grp; mean<br>duration of entire<br>cohort=4mo SD<br>3.2;<br>British Thoracic<br>Society<br>guidelines{3882}<br>recommends 4-6 w<br>of ABs;<br>Authors wrote PBB<br>Dx after other<br>underlying<br>conditions<br>excluded but<br>results suggest<br>otherwise |

**Supplementary Table S1.1b**

**Retrospective studies on children with chronic wet cough that included management (diagnosis and Rx) outlining the evidence for presence of PBB (part KQ 1)** [modified with permission from Chest 20016;149:120-42,{6008} Chest 2016;149:106-19{5954} and Pediatric Pulmonology 2016{5970}]

| First author, publication yr, country | Setting                                                    | Inclusion criteria; Exclusion                                                                                                        | N; Age; FU length                             | Main aim(s)                                                                                                                                             | Primary finding relating to KQ                                                                                  | Proportion with PBB <sup>A</sup> in cohort; Definition used; Symptoms and signs                                                                                                                             | Duration of cough; other comment                                                      |
|---------------------------------------|------------------------------------------------------------|--------------------------------------------------------------------------------------------------------------------------------------|-----------------------------------------------|---------------------------------------------------------------------------------------------------------------------------------------------------------|-----------------------------------------------------------------------------------------------------------------|-------------------------------------------------------------------------------------------------------------------------------------------------------------------------------------------------------------|---------------------------------------------------------------------------------------|
| Donnelly{3644}<br>2007,<br>England    | Single center, Resp OPD; review of clinic letters (random) | “Persistent, wet cough present for 1 mo that resolves with appropriate AB Rx”                                                        | 81; Median age=3.8 y (range 0.4, 14.8); FU=NR | To present “results of a retrospective review of outcomes in 81 randomly selected patients diagnosed with PBB”                                          | 95% cured with AB use; 48% reported ‘wheeze’ but had ‘rattle’                                                   | 95%; Def: wet cough $\geq$ 1 mo that resolves with AB Symptoms: wheeze=48%, dyspnea=43%, Signs: rattle~48% (article reported almost all with wheeze), coarse inspiratory and expiratory noises=“a minority” | 59% coughing for >1 yr; BE in 4 of 14 who had chest CT; 31% with concomitant ‘asthma’ |
| Kompare{5095}<br>2011,<br>USA         | Single center, Resp & allergy OPD                          | Cough, wheeze or noisy breathing of >1 mo without other diagnoses, infected BAL ( $\geq 10^4$ cfu/ml) and response to $\geq 2$ w ABs | 70 in cohort (cough=51) Summary age NR; FU=NR | Review of all infected BAL of children aged <5y with cough, wheeze or noisy breathing of >1 mo without other diagnoses, to determine if PBB was present | Outcome data (available in 87%): symptoms resolved with AB Rx in all but one child. Length of AB was $\geq 2$ w | 73% with cough; PBB not defined in paper but implied def=BAL with $10^4$ cfu/ml Of those with cough, wheeze present=31%, “noisy breathing”=18% Wheeze + noisy breathing=6%                                  | Median=5 mo (range 1-60 ); Tracheo- or broncho-malacia=74%; Asthma=2.9%               |

|                                     |                                                                                      |                                                                                                                                                                                      |                                                                                |                                                                                                                      |                                                                                                                                                                                                       |                                                                                                                                                                                                                |                                                                                                                                                                                                       |
|-------------------------------------|--------------------------------------------------------------------------------------|--------------------------------------------------------------------------------------------------------------------------------------------------------------------------------------|--------------------------------------------------------------------------------|----------------------------------------------------------------------------------------------------------------------|-------------------------------------------------------------------------------------------------------------------------------------------------------------------------------------------------------|----------------------------------------------------------------------------------------------------------------------------------------------------------------------------------------------------------------|-------------------------------------------------------------------------------------------------------------------------------------------------------------------------------------------------------|
| Pritchard{5767}<br>2014,<br>England | Single center, Pediatric or Resp OPD                                                 | AB responsive wet cough confirmed by a positive BAL culture (undefined)                                                                                                              | 43 (+1 lost to FU); Median age=2.7y (IQR 1.5, 4); FU=11.3 mo (IQR 8.3-14.7)    | Review of outcomes for children with AB responsive wet cough with positive BAL culture                               | Cough resolved in 77% after initial AB course (6-8 w) but only 24% remained cough free i.e high relapse rate                                                                                          | 100%<br>Def=AB responsive wet cough;<br>Other symptoms and signs not described                                                                                                                                 | Median=11 mo (IQR 9-14.7);<br>Of the 10 whose cough did not resolve after 2 w ABs, 6 required prolonged AB course, 3 had other conditions                                                             |
| Smith{5958}<br>1985,<br>USA         | Resp OPD, Chart review                                                               | Presence of chronic bronchitis by FB evaluation. Exc: CF or other abnormality that could contribute to chronic bronchitis                                                            | 20, FU=NR; Mean age=5.7y (range 0.5-15)                                        | To investigate clinical, allergic, immunologic and physiological characteristics of children with chronic bronchitis | Existence of chronic bronchitis, 9 of the 11 treated with AB clinically improved; 6 of the 26 with chronic bronchitis had other causes (tracheostomy, BPD, BE, emphysema, lung abscess, foreign body) | PBB not used in paper; Def=Not applicable; “All judged to have experienced benefit from bronchodilator therapy”, the symptoms and signs not described                                                          | Authors concluded that chronic bronchitis in children is distinct from adults<br><br>None had CT scan; thus likely some had BE as length of symptoms were 1 w to 15 y                                 |
| Wang,{6061}<br>2015;<br>China       | Single centre, Hospitalised in children's hosp, unclear how children were identified | Chronic cough (>4 w) without acute lower resp infection and no response to conventional Rx. Excl: heart dis, immune-deficiency, pulmonary dysplasia, neuromuscular dis, foreign body | 66 with wet cough of which 50 had PBB; median age=10 mo (5.8-14 <sup>3</sup> ) | To describe the clinical characteristics children aged < 3 y with PBB                                                | Cough resolved in 76% of PBB group, children treated with amox-clav for 17.4 ± 9.0 d (max 22 d)                                                                                                       | 75.8%;<br>Def: (a) isolated chronic wet cough; (b) positive BAL culture or neutrophilia (> 3.5%); and (c) resolution of cough with ABs within 2 w; (d) absence of alternative etiology. Wheeze=90%, stridor=4% | Mean cough 10.0 (± 1.6 <sup>3</sup> ) weeks; Although this was a retrospective study, parents completed a daily cough diary for 28 d post enrolment and all Rx with amox-clav, airway malacia in 44%. |

**Supplement Table S1.2: Current national pediatric chronic cough guidelines [from Pediatric Pulmonology 2016{5970}]**

| First author, publication year | Country   | Society                                                        | PBB mentioned or specified        | Definition used*                               |
|--------------------------------|-----------|----------------------------------------------------------------|-----------------------------------|------------------------------------------------|
| Chang{3101} 2006               | Australia | Thoracic Society of Australia and New Zealand                  | Yes                               | PBB-clinical $\pm$ PBB-micro                   |
| Chang{3114} 2006               | USA       | American College of Chest Physicians                           | Yes                               | Chronic wet cough and response to 2-4 w of ABs |
| Gibson{4718} 2008              | Australia | Australian Lung Foundation                                     | Yes (pediatric section)           | PBB-clinical $\pm$ BAL                         |
| Kohno{3700} 2006               | Japan     | Japanese Respiratory Society                                   | No                                | Not applicable                                 |
| Leconte{4575} 2008             | Belgium   | Primary care                                                   | Yes                               | Not defined                                    |
| Lu{5927} 2014                  | China     | Multiple societies                                             | Yes (based on translated article) | PBB-clinical $\pm$ BAL                         |
| Shields{3882} 2008             | England   | British Thoracic Society                                       | Yes                               | Chronic wet cough and response to 4-6 w of ABs |
| Zacharasiewicz{5928} 2014      | Austria   | Austrian Society of Pediatrics, Austrian Society of Pneumology | Yes                               | PBB-clinical $\pm$ BAL                         |

\*Original microbiologic-based case definition{3095}(also termed PBB-micro). (i) Presence of chronic wet cough (>4-weeks), (ii) Lower airway infection (recognized respiratory bacterial pathogens growing in sputum or at BAL at density of a single bacterial species  $\geq 10^4$  colony-forming units/mL); and (iii) Cough resolved following a 2-week course of an appropriate oral AB (usually amoxicillin-clavulanate)

PBB-clinical (modified clinical-based case definition{3101, 5970}) = (i) Presence of chronic wet cough (>4-weeks); (ii) Absence of symptoms or signs of other causes of wet or productive cough<sup>^</sup>; and (iii) Cough resolved following a 2-week course of an appropriate oral AB (usually amoxicillin-clavulanate). [<sup>^</sup>Specific cough pointers{3114, 3101, 1192} are: chest pain, history suggestive of inhaled foreign body, dyspnea, exertional dyspnea, hemoptysis, failure to thrive, feeding difficulties (including choking/vomiting), cardiac or neurodevelopmental abnormalities, recurrent sino-pulmonary infections, immunodeficiency, epidemiological risk factors for exposure to tuberculosis, signs of respiratory distress, digital clubbing, chest wall deformity, auscultatory crackles, chest radiographic changes (other than perihilar changes), lung function abnormalities].



**Supplement Table S1.3a: Prospective studies involving children with protracted bacterial bronchitis [modified with permission from Chest 2006;134:120-42,{6008} Chest 2016;149:106-19{5954} and Pediatric Pulmonology 2016{5970}]**

| 1 <sup>st</sup> author, publication yr; country | Setting ; Study design                   | Inclusion criteria; Exc or definitions                                                                                                                                                                                                               | No. enrolled, No. completed; Age                                                                                                               | Main aim(s)                                                                                                                                                                                                                                                                              | Key findings of the PBB component                                                                                                                                                                                                                 | Specimen; microbiology results          | Other main findings                                                 |
|-------------------------------------------------|------------------------------------------|------------------------------------------------------------------------------------------------------------------------------------------------------------------------------------------------------------------------------------------------------|------------------------------------------------------------------------------------------------------------------------------------------------|------------------------------------------------------------------------------------------------------------------------------------------------------------------------------------------------------------------------------------------------------------------------------------------|---------------------------------------------------------------------------------------------------------------------------------------------------------------------------------------------------------------------------------------------------|-----------------------------------------|---------------------------------------------------------------------|
| Marchant, {3095} 2006; Australia                | Single center, Resp OPD                  | >3 w cough, age <18 y and newly referred<br>Exc: NR                                                                                                                                                                                                  | No. with PBB=43;<br>Median age of whole cohort=2.6 y (IQR 1.2-6.9)                                                                             | In children with chronic cough, to; (a) evaluate the use of an adult-based algorithmic approach in the management, (b) describe the etiology                                                                                                                                             | BAL median total cell count and neutrophil% in PBB ( $350 \times 10^6/L$ , 40%) was significantly higher than 'natural resolution' group (228, 4%)                                                                                                | BAL;<br>Hi=47%,<br>Spn=35%;<br>Mcat=26% |                                                                     |
| Marchant, {4395} 2008; Australia                | Single center, Resp OPD; cross-sectional | PBB=chronic wet cough (>3 w), BAL bacterial culture ( $\geq 10^5$ CFU/mL) & response to Abs (cough resolved 2 w);<br>Other etiologies =other chronic cough aetiologies in cohort,{3095}<br>Controls=children with stridor, but without chronic cough | PBB=38, other Dx=25, SR=22, controls=15;<br>Respective median age (IQR): 2.4 y (0.9-4.2), 2.6 y (1.1, 9.6), 3.8 y (0.9, 6.8), 2.8 y (0.6, 9.8) | To: (a) describe the clinical profile, airway cellularity and promoters of neutrophilic inflammation in BAL of children with PBB compared to children with other etiologies and controls without cough , (b) explore selected innate immunity signaling receptors, specifically TLR-2,-4 | BAL in PBB group had significantly elevated total cell counts, airway neutrophilia, IL-8, and active MMP-9 compared to other groups<br><br>TLR-2 and -4 mRNA relative expression ratio in BAL of PBB group was significantly higher than controls | BAL;<br>Hi=45%,<br>Spn=32%;<br>Mcat=24% | IL-8 levels significantly correlated with BAL neutrophil% and MMP-9 |
| Chang,{5188} 2012; Australia                    | Single center, Resp                      | PBB=chronic wet cough, response to ABs with                                                                                                                                                                                                          | Current PBB=61, PBB well=20,                                                                                                                   | To determine whether BAL levels of hBD2, SP-A, and MBL: (a)                                                                                                                                                                                                                              | hBD2 and MBL levels in BAL were significantly higher in children with                                                                                                                                                                             | BAL; microbiology NR                    | SP-A levels in the BAL and cytokine production of                   |



|                                  |                                                   |                                                                                                                                                  |                                                                                                   |                                                                                                                                          |                                                                                                                                                                                   |                                                                    |                                                                                                                           |
|----------------------------------|---------------------------------------------------|--------------------------------------------------------------------------------------------------------------------------------------------------|---------------------------------------------------------------------------------------------------|------------------------------------------------------------------------------------------------------------------------------------------|-----------------------------------------------------------------------------------------------------------------------------------------------------------------------------------|--------------------------------------------------------------------|---------------------------------------------------------------------------------------------------------------------------|
|                                  | OPD; cross-sectional                              | resolution of cough within 2 w & absence of signs/symptoms of other dis; PBB well = previous PBB, but no cough when FB done                      | Controls=21; Respective mean age (SD) =2.5 y (2.3), 4.2 y (3.0), 2.2 y (2.8)                      | differed between children with current PBB, PBB well, and controls; and (b) related with airway neutrophilia and endobronchial infection | PBB compared with PBB well group and controls. hBD2 levels were associated with airway infection and are related to airway neutrophilia and MBL                                   |                                                                    | stimulated BAL cells similar between groups.                                                                              |
| Marchant, {5280} 2012; Australia | Single center, Pediatric and resp OPD; RCT        | Aged 0.5-18 y, doctor observed wet cough >3 w; Exc: chronic lung, cardiac or neuro-developmental disorders, ABs in last 2 w or if acutely unwell | 50, 3 lost to FU that were analyzed as failures. Mean=1.8 y for Rx gp and 2.8 y for placebo group | Efficacy of 2 w of oral amox-clav (compared with placebo) in achieving cough resolution in children with chronic wet cough               | Amox-clav effective for wet cough- cough resolution rates (48%) in amox-clav group vs placebo (16%), p=0.016                                                                      | BAL; Hi=38%, Spn=24%; Mcat=19% All amox-clav sensitive             | BAL in subgroup (n=37): Results consistent with PBB                                                                       |
| Wurzel{5646} 2014; Australia     | Single center, Resp OPD; cross-sectional          | PBB=clinical def; Controls=chronic resp symptoms, but no PBB, CSLD                                                                               | PBB=104, Controls=21; Respective median age (IQR)=19mo (12-30), and 20mo (8-63)                   | To provide extensive clinical, laboratory, and BAL characterization of PBB                                                               | Previous parent-reported wheeze (81%), but no increased propensity to atopy (IgE and RAST normal). Normal immunoglobulin levels and antibody responses (Hib and tetanus vaccines) | BAL; In PBB grp; Hi=72%, Spn=39%; Mcat=43%; AdV=23%; Any virus=38% | PBB and childcare attendance elevated serum NK-cell levels; Tracheo-broncho-malacia common, but similar rates in controls |
| Baines,{5693} 2014; Australia    | Single center, Resp OPD; exp & validation cohorts | PBB=clinical definition; Resolved PBB =previous PBB, but no cough at FB                                                                          | Exp: PBB=21; Controls=33; Respective mean ages= 2.3 and 9.7 y; Validation: PBB=36; Controls=11;   | To evaluate the IL-1 and TNF- $\alpha$ /NF- $\kappa$ B pathways and mediators in 2 cohorts of PBB and control children                   | Increased expression of neutrophil-related mediators in PBB, including IL-1 pathway members, neutrophil $\alpha$ -defensins, and the chemokine receptor CXCR2                     | BAL: Microbiology NR                                               | IL-1 $\beta$ protein levels correlated with BAL neutrophilia & duration and severity of cough symptoms                    |

|                                             |                                          |                                                   |                                                                                                                                   |                                                                                                                                                                                      |                                                                                                                                                                                  |                                                                                     |                                                                                       |
|---------------------------------------------|------------------------------------------|---------------------------------------------------|-----------------------------------------------------------------------------------------------------------------------------------|--------------------------------------------------------------------------------------------------------------------------------------------------------------------------------------|----------------------------------------------------------------------------------------------------------------------------------------------------------------------------------|-------------------------------------------------------------------------------------|---------------------------------------------------------------------------------------|
|                                             |                                          |                                                   | Respective mean ages=2.0 and 0.7 y                                                                                                |                                                                                                                                                                                      |                                                                                                                                                                                  |                                                                                     |                                                                                       |
| Wurzel,{5712} 2014; Australia               | Single center, Resp OPD; cross-sectional | PBB=clinical def; BE=Dx on CT scan                | PBB=159, BE=112; Median (IQR) age: PBB with AdV=17mo (12-22), PBB without AdV=26mo (15-56)                                        | To identify: (a) the prevalence of AdV; (b) diversity of genotypes and species (c) whether presence of AdV increased the odds of bacterial coinfection                               | AdV-C (genotypes 1, 2) was the major AdV species in BAL; lower airway bacterial infection, (with Hi, Mcat and Spn, but not Sa) increased in those with AdV                       | BAL; In AdV+ grp; Hi=68%, Spn=39%; Mcat=35%. In AdV- grp; Hi=47%, Spn=22%; Mcat=19% | Younger age independent predictor of AdV with respiratory bacteria co-infection       |
| Van der Gast,{5715} 2014; USA and Australia | Multi-center, Resp OPD; cross-sectional  | PBB=clinical def; BE=Dx on CT scan; CF=sweat test | PBB=12, BE=19; CF=25; Respective mean (SD) age: 8.9 y (4.7), 2.3 y (1.7), 12.5 y (3.5)                                            | To compare: (a) the core and satellite microbiota in cohorts of children with different diseases; (b) the respiratory metacommunities in PBB and pediatric and adult CF and BE cases | Similar resp sample core microbiota in the 3 diseases; microbiota from adults with CF and BE differed significantly from each other and from those of children with the same dis | BAL and sputum; traditional and non-traditional organisms described                 |                                                                                       |
| Chang,{5797} 2015; Australia                | Multi-center, Resp OPD                   | PBB=clinical definition                           | PBB=138, asthma=52, BE=20, self-resolved=40 Median age (IQR) PBB=2.4 yr (1.2, 4.8) BE=3.9 (2.2, 6.4) Self resolved=5.2 (2.1, 8.2) | In children newly referred for chronic cough, to describe data relating specific cough pointers of the 3 most common etiologies                                                      | At presentation (preDx), cough score,{938} PC-QOL, PedQL scores, number of doctors' visits between groups were similar                                                           | Not applicable                                                                      | Likelihood ratios, sensitivity, specificity of the different symptoms/signs presented |

|                                    |                                                              |                                                                                                                                            |                                                                                                                                             |                                                                                                                                                                                                                                                                                                    |                                                                                                                                                                                                                                                                                                                                                                                                                                  |    |                                                                                                                                                                                                                                                                                       |
|------------------------------------|--------------------------------------------------------------|--------------------------------------------------------------------------------------------------------------------------------------------|---------------------------------------------------------------------------------------------------------------------------------------------|----------------------------------------------------------------------------------------------------------------------------------------------------------------------------------------------------------------------------------------------------------------------------------------------------|----------------------------------------------------------------------------------------------------------------------------------------------------------------------------------------------------------------------------------------------------------------------------------------------------------------------------------------------------------------------------------------------------------------------------------|----|---------------------------------------------------------------------------------------------------------------------------------------------------------------------------------------------------------------------------------------------------------------------------------------|
| Hodge{59<br>52} 2016;<br>Australia | Single<br>center,<br>Resp<br>OPD;<br>cross-<br>section<br>al | PBB-micro;<br>Controls=no<br>cough and FB<br>undertaken for<br>other reasons (e.g.<br>stridor); BE=CT<br>defined with<br>clinical symptoms | PBB=13,<br>BE=55,<br>controls=13.<br>Median ages<br>and IQR:<br>PBB=6.5 mo<br>(1.6, 14)<br>BE=22 mo<br>(14, 33)<br>Controls=5.5<br>(4, 9.9) | (a) Quantify<br>phagocytosis of airway<br>apoptotic cells and<br>NTHi by alveolar<br>macrophages in<br>children with PBB and<br>BE;<br>(b) Determine if<br>phagocytic capacity<br>was associated with<br>clinical or demographic<br>variables, and differing<br>patterns of airway<br>inflammation | Macrophage phagocytic<br>capacity significantly<br>lower in PBB and BE c.f.<br>controls (p=0.003 and<br><0.001 for efferocytosis<br>and 0.041 and 0.004 for<br>phagocytosis of NTHi;<br>PBB and BE respectively);<br>median phagocytosis of<br>NTHi: BE=13.7% (IQR<br>11-16%) PBB=16% (11-<br>16%), controls=19.0%<br>(13-21%); median<br>efferocytosis: BE=14.1%<br>(10-16%), PBB=16.2%<br>(14-17%), controls=18.1%<br>(16-21%) | NR | IL-1 $\beta$ levels<br>significantly<br>correlated BAL<br>%neutrophil<br>(r=0.93 p=0.0001).<br>Negative, but non-<br>significant<br>correlations<br>between IL-1 $\beta$ and<br>phagocytosis of<br>apoptotic cells or<br>NTHi (r= -0.37<br>p=0.080, -0.43<br>p=0.099<br>respectively) |
|------------------------------------|--------------------------------------------------------------|--------------------------------------------------------------------------------------------------------------------------------------------|---------------------------------------------------------------------------------------------------------------------------------------------|----------------------------------------------------------------------------------------------------------------------------------------------------------------------------------------------------------------------------------------------------------------------------------------------------|----------------------------------------------------------------------------------------------------------------------------------------------------------------------------------------------------------------------------------------------------------------------------------------------------------------------------------------------------------------------------------------------------------------------------------|----|---------------------------------------------------------------------------------------------------------------------------------------------------------------------------------------------------------------------------------------------------------------------------------------|

**Supplementary Table S1.3b: Retrospective studies on children including children with protracted bacterial bronchitis** [modified with permission from Chest 20016;149:120-42,{6008} Chest 2016;149:106-19{5954} and Pediatric Pulmonology 2016{5970}]

| First author, publication yr; country | Setting; Study design                        | Definition of PBB used                                                                                                         | No. in study; Age                   | Main aim(s)                                                                                                                                                                       | Key finding(s)                                                           | Specimen; microbiology                                                      | Other main findings                                                                                                                    | Comment                                                         |
|---------------------------------------|----------------------------------------------|--------------------------------------------------------------------------------------------------------------------------------|-------------------------------------|-----------------------------------------------------------------------------------------------------------------------------------------------------------------------------------|--------------------------------------------------------------------------|-----------------------------------------------------------------------------|----------------------------------------------------------------------------------------------------------------------------------------|-----------------------------------------------------------------|
| Donnelly, {5644} 2007; England        | Resp OPD; review of clinic letters (random)  | Persistent, wet cough present for 1mo that resolved with “appropriate” AB Rx                                                   | 81; Median=3.8 y (range 0.4, 14.8)  | Review the outcomes in 81 randomly selected patients diagnosed with PBB                                                                                                           | 95% cured with AB use; 48% reported ‘wheeze,’ but had a ‘rattle’ instead | BAL (n=19), Cough swab (n=51). Of infected specimens (~50%): Hi=81% Spn=37% | 59% symptomatic for >1yr; BE in 4/14 who had chest CT scan; 31% with concomitant ‘asthma’ (BDR demonstrated or responsive to steroids) | Not all children had PBB based on original definition of PBB    |
| Kompare, {5095} 2011; USA             | Resp & allergy OPD                           | Cough, wheeze or noisy breathing for >1 mo without other diagnoses, BAL ( $\geq 10^4$ CFU/mL) and response to $\geq 2$ w AB Rx | 70; Summary age NR                  | Review all BAL ( $\geq 10^4$ CFU/mL) cultures of children aged <5 y with cough, wheeze or noisy breathing for >1 mo without other diagnoses so as to determine if PBB was present | Tracheo- or broncho-malacia present in 74%;                              | BAL Hi=56%, Spn=37%; Mcat=59%                                               | Outcome data (available in 87%): symptoms resolved with AB Rx in all but one child                                                     | Bronchitis itself may cause malacia                             |
| Narang,{5776} 2014; England           | Pediatric and Resp OPD; 50 consecutive notes | Suspected PBB (ND)                                                                                                             | 50; Median age=2.9 y (IQR 1.7, 4.4) | Review BAL and chest radiograph results, and assess the bacterial distribution across lung lobes                                                                                  | Bacterial distribution in PBB was heterogeneous                          | BAL Hi=50%, Spn=16% Mcat=28% Sa=22%                                         | Limiting sampling to 1-2 lobes will underestimate the microbiology of the lung (70% positive versus 82%)                               | Positive culture undefined as quantitative culture was not done |

|                                                      |                                       |                                                                                                                                                            |                                                                          |                                                                                                                                                                     |                                                                                                                                         |                                                                                                         |                                                                                                                                                                                                                                                                                 |                                                                                                                                                         |
|------------------------------------------------------|---------------------------------------|------------------------------------------------------------------------------------------------------------------------------------------------------------|--------------------------------------------------------------------------|---------------------------------------------------------------------------------------------------------------------------------------------------------------------|-----------------------------------------------------------------------------------------------------------------------------------------|---------------------------------------------------------------------------------------------------------|---------------------------------------------------------------------------------------------------------------------------------------------------------------------------------------------------------------------------------------------------------------------------------|---------------------------------------------------------------------------------------------------------------------------------------------------------|
| Priftis,{59<br>41} 2013;<br>Greece<br>and<br>England | Resp<br>OPD                           | Children with<br>chronic cough<br>suspected of<br>PBB who had<br>FB to confirm<br>diagnosis                                                                | Greece=18<br>England=39<br>; Median<br>age=4.8 y<br>(range 0.9,<br>14.4) | To (a) determine<br>specific serotypes<br>of Spn and NTHi<br>in BAL samples;<br>(b) compare Spn<br>serotypes between<br>the 2 countries<br>and Spn<br>vaccination   | PCV-13 Spn<br>serotypes in all<br>Greek BALs,<br>but only in<br>72% of<br>English BALs<br>(significantly<br>different b/w<br>countries) | Greek BAL;<br>Hi=61%,<br>Spn=27.6%;<br>Mcat=32%<br>Sa=6%;<br>English BAL<br>restricted to<br>Spn+ specs | Vaccine Spn<br>serotypes rarely<br>found in immunized<br>children (OR=0.02;<br>95%CI 0.003-0.115);<br>26 NTHi isolates<br>(English BAL) had<br>unique genotypes                                                                                                                 | Recent or<br>current AB<br>use NR.<br>Evidence of<br>serotype<br>replacement<br>dis in Spn<br>immunized<br>children                                     |
| Pritchard,<br>{5767}<br>2014;<br>England             | Pediatric<br>and Resp<br>OPD          | AB responsive<br>wet cough and<br>positive BAL<br>culture                                                                                                  | 43;<br>Median<br>=2.7 y<br>(IQR 1.5, 4)                                  | Review of Rx<br>outcomes for<br>children with<br>PBB                                                                                                                | Cough<br>resolved in<br>77% after<br>initial AB<br>course (6-8 w)<br>but only 24%<br>remained<br>cough free (ie.<br>76% relapsed)       | BAL;<br>Hi=63%,<br>Spn=23%;<br>Mcat=51%<br>Sa=19%                                                       | Of the 10 whose<br>cough did not<br>resolve after 6-8 w<br>ABs, 7 required<br>prolonged ABs and 3<br>had other resp<br>conditions                                                                                                                                               | BE more<br>likely to be<br>present when<br>wet cough<br>unresponsive<br>to 4 w of<br>ABs.{5600}<br>Thus likely<br>some in<br>cohort did<br>not have PBB |
| Rother{59<br>73} 2015,<br>Germany                    | Single<br>centre,<br>tertiary<br>hosp | NA with<br>respect to key<br>question.<br>Children with<br>an established<br>diagnosis of<br>asthma, PCD,<br>PBB, acute<br>bronchitis, CF<br>or pneumonia. | 18 children<br>with PBB                                                  | “To develop and<br>test a<br>questionnaire-<br>based and data<br>mining-supported<br>tool providing<br>diagnostic support<br>for selected<br>pulmonary<br>diseases” |                                                                                                                                         | No data                                                                                                 | Def: Chronic cough<br>(>8 w), BAL<br>neutrophilia (>15%),<br>positive BAL culture<br>( $\geq 10^5$ cfu/ml), no<br>underlying diseases<br>(e.g. CF, PCD,<br>immunodeficiency,<br>UACS) and cough<br>improve/resolved<br>within 6 w ABs<br>(amoxicillin 60-80<br>mg/kg/d in most) | Information<br>obtained<br>from authors                                                                                                                 |

**Supplement Table S2.1: Studies on children presenting with chronic wet (productive) cough that included investigations (but excludes research mechanistic studies) and diagnoses of the cough (part key question 2)**

[modified with permission from Chest 20016;149:120-142 {6008} and Pediatric Pulmonology 2016{5970}]

| First author, pub yr, country | Setting ; Study design                            | Inclusion criteria; Exclusion (Exc)                                                              | N; Age; FU length                                                        | Main aim(s)                                                                                | Primary findings relating to KQ                                                                                                                                                               | Specimen type; Bacteriology^                       | Other major findings or comment                                                                                                                                                               |
|-------------------------------|---------------------------------------------------|--------------------------------------------------------------------------------------------------|--------------------------------------------------------------------------|--------------------------------------------------------------------------------------------|-----------------------------------------------------------------------------------------------------------------------------------------------------------------------------------------------|----------------------------------------------------|-----------------------------------------------------------------------------------------------------------------------------------------------------------------------------------------------|
| Aluoch{5957} 1984, Kenya      | Single center; General OPD, Prosp cross sectional | Aged >6 yr, first attendance with main complaint of cough, sputum (>1 mo) or hemoptysis; Exc: NR | N=601; N with sputum=601; median age NR and study included adults; FU=NR | Yield of tuberculosis from systemic examination of first presentation                      | Yield of active tuberculosis cases (bacteriology confirmed)=5.5% of cohort; 0% of those aged <15 y; 2.6% in 15-24 y. No difference in yield when cough duration grouped by 1-3 mo vs. 4-12 mo | Sputum; Other than TB, no other pathogens reported | Wet cough was not mentioned but as sputum obtained in all, productive cough present. Results dependent on smear + culture, thus, results would grossly under-estimate pediatric TB prevalence |
| Asilsoy,{4030} 2008 Turkey    | Single center, Pediatric OPD; cohort              | Chronic cough (>4 w) Exc: NR                                                                     | N=108, N completed =108 FU:NR Mean age= 8.4 y range 6-14                 | “Evaluate children with cough in accordance with the 2006 ACCP guidelines”{4030}           | 94.5% success of determining etiology. Causes of wet cough found in 40% (PBB, BE, TB, congenital malformation)                                                                                | NR                                                 | ACCP guidelines recommends investigating if the wet cough persists after 4 w ABs or if specific cough pointers present                                                                        |
| Chang{2789} 2006 Australia    | Single center; Resp OPD, Prosp cross section      | Children undergoing FB without a known underlying resp Dx                                        | N=106; Median age=2.6 y, IQR 5.7 FU=NR                                   | Compare (a) cough quality (wet/dry and brassy/non-brassy) to FB findings of secretions and | Parent's assessment of cough quality (wet/dry) agreed with clinicians' (Kappa= 0.75, 95%CI 0.58–0.93). Clinicians marginally better than                                                      | NR                                                 | BAL total cell count and airway neutrophilia was significantly higher in those with wet cough                                                                                                 |

|                            |                                              |                                                                              |                                                                                                 |                                                                                                                                 |                                                                                                            |    |                                                                                                                          |
|----------------------------|----------------------------------------------|------------------------------------------------------------------------------|-------------------------------------------------------------------------------------------------|---------------------------------------------------------------------------------------------------------------------------------|------------------------------------------------------------------------------------------------------------|----|--------------------------------------------------------------------------------------------------------------------------|
|                            | al                                           |                                                                              |                                                                                                 | tracheomalacia respectively, (b) parent's vs clinician's evaluation of cough quality (wet/dry).                                 | parent's when compared to secretions seen during FB (aROC = 0.85 95%CI 0.77, 0.92)                         |    |                                                                                                                          |
| Chang{5444} 2013 Australia | Multicenter, Resp OPD, RCT                   | Aged <18 y, >4 w cough, newly referred; Exc: known chronic resp illness      | N enrolled=270, N completed =253<br>FU=12 mo for Dx, 6 mo post Dx; Mean=4.5 y, SD=3.7           | Determine if Mx according to a standardized clinical Mx pathway improves clinical outcomes                                      | Earlier application of the pathway led to earlier cough resolution and improved parental quality of life   | NR | Pathway{4921} recommends Ix when cough pointers are present and when wet cough does not resolve after 4 w of ABs         |
| Chang{5797} 2015 Australia | Multi-center, Resp OPD; cohort               | Aged <18 years >4 w cough newly referred<br>Exc: chronic respiratory illness | N cohort=346, N completed =326;<br>Follow-up=12 mo for Dx, 6 mo post Dx<br>Mean age=4.5 y, SD 3 | In children newly referred for chronic cough, to describe data relating specific cough pointers of the 3 most common etiologies | Children were investigated if wet cough not resolved after 4 w of Rx or if specific cough pointers present | NR | In those with wet cough, OR=73.7 (95%CI 10, 544.2) for finding an etiology where ABs was effective                       |
| Coren{2210} 1998 England   | Uni-center; General OPD, Prosp cross section | All CT scans undertaken over 12 mo.<br>Exc: NR                               | 102 children had 106 CTs.<br>FU=NR;<br>Median age = 5 y<br>range 7 w-15 y                       | To determine whether use of pediatric chest CT scans was appropriate (new Dx and how it influenced Mx)                          | Of the 48 scans done for chronic (>6 mo) productive cough, 38 (79%) abnormal                               | NR | Abnormalities: BE=21, interstitial lung dis=1, bronchiolitis obliterans=1, congenital lung emphysema=1, minor changes=14 |



|                             |                                                  |                                                                                                                                                                                                                                     |                                                           |                                                                                                                                                            |                                                                                                                                      |                                                                                                                                     |                                                                                                                                                           |
|-----------------------------|--------------------------------------------------|-------------------------------------------------------------------------------------------------------------------------------------------------------------------------------------------------------------------------------------|-----------------------------------------------------------|------------------------------------------------------------------------------------------------------------------------------------------------------------|--------------------------------------------------------------------------------------------------------------------------------------|-------------------------------------------------------------------------------------------------------------------------------------|-----------------------------------------------------------------------------------------------------------------------------------------------------------|
| De Baets{5959} 2012 Belgium | Dual-center; Respl OPD, Prosp cross sectional    | “Persistent resp symptoms, productive cough, bronchorrhoea and wheezing for $\geq 3$ mo.”<br>Exc: premature, failure to thrive, CF, prolonged intubation, tracheotomy, dysmorphic, neurology or cardiac problems, CXR consolidation | N=124; FU=NR; Median age=10 mo, (IQR 7-14)                | Description of results of diagnostic investigations in children with persistent resp symptoms despite regular asthma Rx                                    | Laryngo-tracho-bronchomalacia in 46%; mucosal inflammation in 79%. Those with mucosal inflammation had airway neutrophilia           | Non-quantitative BAL; Culture +ve in 56% NTHi=28%, Spn=13%; Mcat=51% Sa=10% <i>E. coli</i> =4%, <i>K. oxytoca</i> =1% <i>Pa</i> =1% | 24-h pHmetry positive in 29%                                                                                                                              |
| Douros{5027} 2011, Greece   | Allergy-Resp OPD, Retros                         | Chronic (>6 w) wet cough with FB undertaken for criteria++;<br>Exc: CF, immunodeficiency, neuromuscular disorder, aspiration                                                                                                        | 93; FU=NR<br>Mean age=5.8 y<br>SD 3.6                     | In children with chronic wet cough: (a) Comparison of chest CT and FB in detecting airway abnormalities and (b) explore radiologic and FB/BAL associations | (a) FB/BAL superior to CT in detecting abnormal changes<br>(b) Bhalla score correlated with cough duration ( $r=0.23$ , $p=0.028$ )  | Quantitative BAL ( $\geq 10^4$ cfu/ml)<br>Hi=37%, Spn=27%; Mcat=18% G-bact=12%; Sa=5% Pa=5%                                         | Bhalla score correlated with FB findings of increasing severity and % neutrophils in BAL and worse bronchoscopic classification{1920}; Response to ABs NR |
| Gedik{6062}, 2015, Turkey   | Single center, pediatric or Allergy dept; Cohort | Aged < 17 y, cough >4 w.<br>Exc: known chronic resp, neuromuscular, growth, or cardiac problems,                                                                                                                                    | N=563, N completed=563<br>FU:NR<br>Mean age=5.4<br>SD 3.8 | The evaluation of children with chronic cough and aged-based etiological factors                                                                           | 85 children had wet cough and all underwent FB. Amox-clav (2-4 w) given to 81. Cough resolved in 67 (78.8%), and changed from wet to | 11.9% of cohort; Chronic wet cough, with and resolution of the cough to ABs within 2–4 w; By definition,                            |                                                                                                                                                           |

|                                   |                                             |                                                                                                                                                                                                             |                                                                              |                                                                                                                                                            |                                                                                                                                                                                                                         |                                        |                                                                                                                                                    |
|-----------------------------------|---------------------------------------------|-------------------------------------------------------------------------------------------------------------------------------------------------------------------------------------------------------------|------------------------------------------------------------------------------|------------------------------------------------------------------------------------------------------------------------------------------------------------|-------------------------------------------------------------------------------------------------------------------------------------------------------------------------------------------------------------------------|----------------------------------------|----------------------------------------------------------------------------------------------------------------------------------------------------|
|                                   |                                             | syndromes, or prematurity                                                                                                                                                                                   |                                                                              |                                                                                                                                                            | dry in remaining 14 who were then Rx with ICS with resolution of the cough. Remaining children: vascular ring (n=1) and TBM (n=3)                                                                                       | no other symptoms or signs present     |                                                                                                                                                    |
| <b>Goyal{5600} 2014 Australia</b> | Single center; Resp OPD, Retrospective      | Chronic wet cough (>4 w) and having completed >4 w of oral ABs directed against likely resp bacteria<br>Exc: asthma, CF, known BE or CT scans requested by oncology, surgical, intensive care, trauma teams | N=144 (106 with BE); FU=NR; Median age=4.7 y (range 0.3-17)                  | “To determine whether a child with chronic wet cough and poor response to at least 4 weeks of oral ABs is more likely to have BE” (radiologically defined) | Non response to 4 weeks of ABs increased risk of having BE (adjusted OR=20.9, 95% CI 5.4, 81.8). Being Indigenous was also independently associated with BE (adjusted OR=5.9, 95% CI 1.2, 28.5)                         | NR                                     | Median duration of persistent wet cough=12 mo (range 1.5-144). Cough >12 mo was not significantly associated with presence of BE aOR=3 (0.97, 9.3) |
| <b>Karabel{5644} 2014 Turkey</b>  | Single center, Resp OPD, Prospective cohort | >4 w cough<br>Exc: NM, cardiac, syndromes, RTI in last 4 w                                                                                                                                                  | N cohort=270, N completed=270, FU=12 mo<br>Mean age=6.5 y<br>range 7 mo-17 y | To determine the etiology of chronic cough in children using the ACCP guidelines                                                                           | 97 (36%) of cohort had wet cough. All had abnormal CXRs. In accordance to ACCP guidelines, Ix were untaken. Dx were BE=22, TB=2, CF=3, foreign body=2, laryngeal web=1, fistula=2, lymphangioma=1, airway abnormality=4 | NR                                     | ACCP guidelines recommends investigating if the wet cough persists after 4 w ABs or if specific cough pointers present                             |
| <b>Kompare{5095} 2011,</b>        | Resp & allergy OPD;                         | Cough, wheeze or noisy breathing of >1 mo without                                                                                                                                                           | 70 in cohort (cough=51) FU=NR                                                | Review of all infected BAL of children aged <5                                                                                                             | Tracheo- or broncho-malacia present in 74%                                                                                                                                                                              | Quantitative BAL ( $\geq 10^4$ cfu/ml) | Outcome data (available in 87%): symptoms resolved                                                                                                 |

|                                |                                     |                                                                                                                                                      |                                                                                                        |                                                                                                                                                    |                                                                                                                                                     |                                                                          |                                                                                      |
|--------------------------------|-------------------------------------|------------------------------------------------------------------------------------------------------------------------------------------------------|--------------------------------------------------------------------------------------------------------|----------------------------------------------------------------------------------------------------------------------------------------------------|-----------------------------------------------------------------------------------------------------------------------------------------------------|--------------------------------------------------------------------------|--------------------------------------------------------------------------------------|
| USA                            | Retrospect                          | other diagnoses, infected BAL ( $\geq 10^4$ cfu/ml) and response to $\geq 2$ weeks AB Rx                                                             | Summary age NR                                                                                         | y with cough, wheeze or noisy breathing of $>1$ mo without other diagnoses, to determine if PBB was present                                        | (note only 51 of the cohort had cough)                                                                                                              | Hi=55.7%, Spn=37.1%; Mcat=58.6%                                          | with AB Rx in all but one child                                                      |
| Lim{5960} 2012 England         | Single center; Resp OPD; Retrospect | Chronic wet cough ( $>8$ w) attending clinic over a 12-mo Exc: CF                                                                                    | 96 children with wet cough, 66 tested; All $>2$ y (summary NR); FU=18 mo                               | “determine the prevalence of specific antibody deficiency in children with chronic wet cough”{5960}                                                | 58% failed to mount an adequate antibody response to Spn polysaccharide 23-valent vaccine, consistent with specific antibody deficiency             | 7 had “positive culture of bacteria pathogens on resp sample” (types NR) | 3 of 5 children who subsequently had CT scans had BE; Duration of cough in cohort NR |
| Marchant {3095} 2006 Australia | Single center, Resp OPD, Prosp      | $>3$ w cough, age $<18$ y and newly referred Exc: NR                                                                                                 | N cohort=108<br>N compl=103<br>N with chronic wet cough=43; FU=12 mo<br>Median age=2.6 y (IQR 1.2-6.9) | In children with chronic cough, to; (a) evaluate the use of an adult-based algorithmic approach in the management, (b) describe the etiology       | Airway malacia present in 35% of cohort; BAL median neutrophil in PBB and total cell count was significantly higher than ‘natural resolution’ group | Quantitative BAL; Hi=47%, Spn=35%; Mcat=26%                              |                                                                                      |
| Seear{835} 1997 Canada         | Single center, Resp OPD, Prosp      | Chronic ( $\geq 3$ mo) productive or rattly cough, with or without wheezing. Exc: known causes of productive cough<br>Controls: children with asthma | N=81<br>N compl=81<br>FU:NR<br>Mean age=8.4y<br>range 6-14 y<br>N controls=60                          | In children with chronic productive cough, “(a) do such diagnostic orphans exist? (b) if so, can they be classified in a clinically useful manner” | All subjects were Ix to determine cause. Chronic bronchitis described but no mention of use of ABs. FB done in 6 of the 34 children                 | NR                                                                       | No Rx described                                                                      |

|                                 |                                                     |                                                                                                                                                                                                               |                                                                                       |                                                                                                                      |                                                                                                                                                                                                     |                                                                                                                                                                                                 |                                                                                                                                                                                        |
|---------------------------------|-----------------------------------------------------|---------------------------------------------------------------------------------------------------------------------------------------------------------------------------------------------------------------|---------------------------------------------------------------------------------------|----------------------------------------------------------------------------------------------------------------------|-----------------------------------------------------------------------------------------------------------------------------------------------------------------------------------------------------|-------------------------------------------------------------------------------------------------------------------------------------------------------------------------------------------------|----------------------------------------------------------------------------------------------------------------------------------------------------------------------------------------|
| Usta,{5929}<br>} 2014<br>Turkey | Single center, pediatric allergy OPD; Prosp cohort  | Inclusion: NR<br>Exc: prematurity, neurodevelopment, cardiac or chronic dis, chest wall deformity, smoking, clubbing, unable to perform spirometry                                                            | N cohort=156, N completed=156, FU=max 18 mo for Dx, NR post Dx; Mean age=8.4 y SD 2.6 | “Evaluate assessment and Mx of chronic cough in children according to the British Thoracic Society (BTS) guidelines” | Unclear how many had wet cough. Causes of wet cough found in 14.7% (PBB, BE, TB).<br><br>Children Dx with PBB when cough resolved with 2 w of clarithromycin                                        | NR                                                                                                                                                                                              | BTS guidelines{3883} recommends Ix in presence of moist cough with irritability and arching after feeds or choking on feeding and specific cough pointers but not adhered to, in paper |
| Wang,{6061} 2015;<br>China      | Single centre, Hospitalised, children's hosp, retro | Chronic cough (>4 w) without acute lower resp infection and no response to conventional Rx.<br>Excl: heart dis, immunodeficiency, pulmonary or bronchus dysplasia, neuromuscular dis, foreign body aspiration | 66 with wet cough of which 50 had PBB; median age=10 mo (5.8–14 <sup>3</sup> )        | To describe the clinical characteristics children aged < 3 y with PBB                                                | Other causes of wet cough not described (group described had FB not wet cough not described)<br><br>Cough resolved in 76% of PBB group, children treated with amox-clav for 17.4 ± 9.0 d (max 22 d) | BAL (≥10 <sup>4</sup> cfu/ml);<br>Hi=47%,<br>Spn=37%,<br>E. Coli=6%<br>Enterobacter=5%<br>Immune function: IgA, IgM, IgG=normal; subtle difference in lymphocyte subsets c.f. diseased controls | Laryngomalacia=32%,<br>tracheomalacia=14%,<br>bronchomalacia=41%<br>Laryngo-bronchomalacia=9%,<br>tracheobronchomalacia=4%<br><br>Unclear how children were identified                 |
| Wurzel{5458} 2014<br>Australia  | Single center, Resp OPD, Prosp                      | Children undergoing FB. Children categorized into wet cough, dry cough, no cough groups;                                                                                                                      | Wet cough n=143<br>Median age=26 mo (IQR 15, 60)<br>Dry cough n=18                    | Examine the relationships between cough nature, lower airway infection and severity of neutrophilic                  | lower airway bacterial infection, viral infection and viral-bacterial co-infection more likely present in wet cough group compared to those                                                         | Quantitative BAL;<br>Wet cough group<br>Hi=34%,<br>Spn=18%;<br>Mcat=15%;                                                                                                                        | No Rx described                                                                                                                                                                        |

|                                |                                                                     |                                                                                                                                                                                                                  |                                                               |                                                                                                                                                                                      |                                                                                                                  |                                                                         |                                                                                                                                                                                      |
|--------------------------------|---------------------------------------------------------------------|------------------------------------------------------------------------------------------------------------------------------------------------------------------------------------------------------------------|---------------------------------------------------------------|--------------------------------------------------------------------------------------------------------------------------------------------------------------------------------------|------------------------------------------------------------------------------------------------------------------|-------------------------------------------------------------------------|--------------------------------------------------------------------------------------------------------------------------------------------------------------------------------------|
|                                |                                                                     | Exc: CF                                                                                                                                                                                                          | Median<br>age=66 mo<br>(IQR 31, 159)<br>FU=NR                 | airway<br>inflammation                                                                                                                                                               | without wet cough                                                                                                | Sa=6%<br>Dry or no<br>cough:<br>Hi=12%,<br>Spn=6%;<br>Mcat=8%;<br>Sa=3% |                                                                                                                                                                                      |
| Zgherea{5<br>093} 2012,<br>USA | Single<br>center,<br>Resp<br>OPD,<br>Chart<br>review,<br>Retrospect | Primary symptom<br>of chronic (>4-w)<br>wet cough who had<br>FB.<br>Exc: CF, ciliary<br>dyskinesia,<br>immune-<br>deficiency,<br>aspiration, asthma,<br>genetic, known<br>airway or neuro-<br>muscular disorders | 197,<br>FU=NR<br>Mean=NR<br><3y:55%;<br>3-7y:36%;<br>>7 y: 9% | “Determine the<br>frequency of<br>lower respiratory<br>tract bacterial<br>infections in<br>children with<br>chronic wet<br>cough and to<br>analyze the<br>bronchoscopic<br>findings” | 91% of BAL showed<br>positive bacterial<br>culture ( $\geq 10^4$ cfu/ml)<br>in those with purulent<br>bronchitis | Quantitative<br>BAL<br>NTHi=49%,<br>Spn=20%;<br>Mcat=17%<br>Sa=12%      | Tracheo- or<br>broncho-malacia<br>present in 24%;<br>positive culture more<br>likely in those with<br>higher<br>bronchoscopic<br>score{3522}<br>(signifying increased<br>secretions) |

**Supplement Table S2.2: Studies that reported on duration of wet cough symptoms to outcomes [modified with permission from Chest 20016;149:120-142 {6008} and Pediatric Pulmonology 2016{5970}]**

| 1st author, publication y, country | Setting ; Study design                            | Inclusion criteria; Exclusion (Exc)                                                                                                                                                                                                                                                 | N; FU length; Age                                                                                                                | Main aim(s)                                                                                                                                             | Key finding(s) relating to KQ                                                                                                  | Specimen type; Bacteriology^                                                                                | Other main findings                                                                                                                            |
|------------------------------------|---------------------------------------------------|-------------------------------------------------------------------------------------------------------------------------------------------------------------------------------------------------------------------------------------------------------------------------------------|----------------------------------------------------------------------------------------------------------------------------------|---------------------------------------------------------------------------------------------------------------------------------------------------------|--------------------------------------------------------------------------------------------------------------------------------|-------------------------------------------------------------------------------------------------------------|------------------------------------------------------------------------------------------------------------------------------------------------|
| Baines,{5693} 2014; Australia      | Single center, Resp OPD; exp & validation cohorts | Children with PBB= history of chronic (>4 w) wet cough and a response to AB with cough resolution within 2 w in the absence of signs and symptoms of other diseases.<br>Controls: age matched children undergoing gastroscopy or bronchoscopy without chronic cough or resp illness | Exp: PBB=21; Controls=33; Respective mean age=2.3 and 9.7 y; Validation: PBB=36; Controls=11; Respective mean ages=2.0 and 0.7 y | To evaluate the IL-1 and TNF- $\alpha$ /NF- $\kappa$ B pathways and mediators in 2 cohorts of PBB and control children                                  | Activation of IL-1 signaling predicts PBB recurrence, IL-1 $\beta$ levels at correlated to duration of cough (r=0.29, p=0.049) | BAL; Bacteriology NR                                                                                        | IL-1 pathway signaling molecules ( <i>PELII</i> , <i>IRAK2</i> ) significantly higher at baseline in those with recurrent vs non-recurrent PBB |
| Douros{5027} 2011, Greece          | Allergy-Resp OPD; Retrospect                      | Chronic (>6 w) wet cough with FB undertaken for criteria++<br>Exc: CF, immune-deficiency, neuromuscular, aspiration                                                                                                                                                                 | 93; FU=NR Mean=5.8 y SD 3.6                                                                                                      | In children with chronic wet cough: (a) Comparison of chest CT and FB in detecting airway abnormalities, (b) explore radiologic and FB/BAL associations | Bhalla score correlated with duration of cough (r=0.23, p=0.028)                                                               | Quantitative BAL ( $\geq 10^4$ cfu/ml)<br>Hi=37%, Spn=27%; Mcat=18% Gram negative bacteria=12%; Sa=5% Pa=5% |                                                                                                                                                |
| Goyal{5600} 2014 Australia         | Single center; Resp OPD,                          | Chronic wet cough (>4 w) and having completed >4 w of oral Abs directed against likely resp                                                                                                                                                                                         | N=144 (106 with BE); FU=NR; Median                                                                                               | “To determine whether a child with chronic wet cough and poor                                                                                           | Cough >12 mo was not significantly associated with                                                                             | NR                                                                                                          | Median duration of persistent wet cough=12 mo                                                                                                  |

|                                                   |                                    |                                                                                                               |                                                                         |                                                                                              |                                                                                                              |                                                                            |                                                                                                            |
|---------------------------------------------------|------------------------------------|---------------------------------------------------------------------------------------------------------------|-------------------------------------------------------------------------|----------------------------------------------------------------------------------------------|--------------------------------------------------------------------------------------------------------------|----------------------------------------------------------------------------|------------------------------------------------------------------------------------------------------------|
|                                                   | Retrospect                         | bacteria. Exc: asthma, CF, known BE or CT scans requested by oncology, surgical, intensive care, trauma teams | age=4.7 y (range 0.3-17)                                                | response to at least 4 weeks of oral ABs is more likely to have BE” (radiologically defined) | presence of BE<br>aOR=3 (0.97, 9.3)                                                                          |                                                                            | (range 1.5-144).                                                                                           |
| <b>Pritchard{<br/>5767}<br/>2014,<br/>England</b> | Pediatric and Resp OPD; Retrospect | AB responsive wet cough that had been confirmed by a positive BAL culture                                     | 43;<br>Median FU=11.3 mo (IQR 8.3–14.7)<br>Median age=2.7y (IQR 1.5, 4) | Review of outcomes for children with AB responsive wet cough with positive BAL culture       | Cough resolved in 77% after initial AB course (6-8 w) but only 24% remained cough free i.e high relapse rate | Non quantitative BAL;<br>Hi=62.8%,<br>Spn=23.3%;<br>Mcat=51.2%<br>Sa=18.6% | Of the 10 whose cough did not resolve after 2 w AB, 6 required prolonged AB course, 3 had other conditions |



**Supplement Table S2.3: Mechanistic studies that studied children with chronic wet cough (not related to BE or CF) that are not included in any tables above (copied with permission from Pediatric Pulmonology 2016{5970})**

| First author, publication y, country  | Setting ; Study design                   | Cohort of children studied                                                                                                                   | N in study; Age                                                                                                                        | Main aim(s)                                                                                                                                                                                                           | Key finding(s)                                                                                                                                                                                                                     | Specimen; microbiology <sup>y</sup>         | Other main findings and/or comment                                                                                                                          |
|---------------------------------------|------------------------------------------|----------------------------------------------------------------------------------------------------------------------------------------------|----------------------------------------------------------------------------------------------------------------------------------------|-----------------------------------------------------------------------------------------------------------------------------------------------------------------------------------------------------------------------|------------------------------------------------------------------------------------------------------------------------------------------------------------------------------------------------------------------------------------|---------------------------------------------|-------------------------------------------------------------------------------------------------------------------------------------------------------------|
| <b>Prospective studies</b>            |                                          |                                                                                                                                              |                                                                                                                                        |                                                                                                                                                                                                                       |                                                                                                                                                                                                                                    |                                             |                                                                                                                                                             |
| <b>Heino{442} 1990 Finland</b>        | Single center, Resp OPD; cross sectional | Chronic productive cough (>3 mo) unresponsive to oral ABs and oral bronchodilators                                                           | N=7; Age range 5-11 y                                                                                                                  | Describe ultrastructural nature of epithelial damage in respiratory symptoms                                                                                                                                          | Epithelial inflammation (increased proportion of intercellular spaces and inflammatory cells) and a reduction in number of ciliated cells                                                                                          | NR                                          | All children had early lower respiratory infection<br><br>CT scan was not performed. Likely these children had BE (5 had obstructive airways on spirometry) |
| <b>Marchant {4395} 2008 Australia</b> | Single center, Resp OPD; cross sectional | PBB=chronic wet cough, other etiologies =other causes of chronic cough in cohort{3095}, Controls=children with stridor without chronic cough | PBB=38, other Dx=25, SR=22, controls=15 ; Respective median age (IQR): 2.4 y (0.9-4.2), 2.6 (1.1, 9.6), 3.8 (0.9, 6.8), 2.8 (0.6, 9.8) | (a) Describe the clinical profile, airway cellularity and promoters of neutrophilic inflammation in BAL of children with PBB c.f. to other etiology & controls, (b) explore selected innate immunity signal receptors | BAL in PBB group had significantly elevated airway neutrophilia, IL-8, active MMP-9, total cell count c.f. other groups.<br><br>TLR-2 and -4 mRNA relative expression ratio in BAL of PBB group significantly higher than controls | Quantitative BAL; Hi=45%, Spn=32%; Mcat=24% | IL-8 levels significantly correlated with BAL neutrophil% and MMP-9                                                                                         |

|                             |                                                   |                                                                  |                                                                                                     |                                                                                                                                                                                               |                                                                                                                                                                                                                     |                                                                                         |                                                                                                                                                           |
|-----------------------------|---------------------------------------------------|------------------------------------------------------------------|-----------------------------------------------------------------------------------------------------|-----------------------------------------------------------------------------------------------------------------------------------------------------------------------------------------------|---------------------------------------------------------------------------------------------------------------------------------------------------------------------------------------------------------------------|-----------------------------------------------------------------------------------------|-----------------------------------------------------------------------------------------------------------------------------------------------------------|
| Chang{5188} 2012 Australia  | Single center, Resp OPD; cross sectional          | PBB, PBB-well (resolved PBB) and controls                        | Current PBB=61, PBB well=20, Controls=21; Respective mean age (SD) =2.5 y (2.3), 4.2 (3), 2.2 (2.8) | Determine whether BAL levels of hBD2, SP-A, and MBL: (a) differed between children with current PBB, PBB-well, and controls; (b) relates with airway neutrophilia and endobronchial infection | hBD2 and MBL levels in BAL were significantly higher in children with PBB compared with PBB well grp and controls. hBD2 levels were associated with airway infection and are related to airway neutrophilia and MBL | Quantitative BAL; Bacteria: NR                                                          | SP-A levels in the BAL and cytokine production of stimulated BAL cells similar between groups.                                                            |
| Wurzel{5646} 2014 Australia | Single center, Resp OPD; cross sectional          | PBB, 'diseased controls'= chronic resp symptoms but no PBB, CSLD | PBB=104, Controls=21; Respective median age (IQR)=19 mo (12-30), 20 (8-63)                          | Provide extensive clinical, laboratory, and BAL characterization of children with PBB                                                                                                         | Previous parent-reported wheeze (81%) but no increased propensity to atopy (IgE and RAST normal). Normal immunoglobulin levels, antibody responses (Hi type b, tetanus vaccines)                                    | Quantitative BAL; In PBB grp; Hi=72%, Spn=39%; Mcat=43%; Adenovirus =23%; Any virus=38% | PBB group: significantly increased odds of childcare attendance elevated serum NK-cell levels; Tracheobronchomalacia common but similar rates in controls |
| Baines{5693} 2014 Australia | Single center, Resp OPD; exp & validation cohorts | PBB, resolved PBB and controls                                   | Exp: PBB=21; Controls=33; Respective mean age =9.7, 2.3 y Validation: PBB=36;                       | To evaluate the IL-1 and TNF- $\alpha$ /NF- $\kappa$ B pathways and mediators in 2 cohorts of PBB and control children                                                                        | "Increased expression of neutrophil-related mediators in PBB, including IL-1 pathway members, neutrophil $\alpha$ -defensins, and the chemokine receptor CXCR2"                                                     | BAL; Microbia not reported                                                              | IL-1 $\beta$ protein levels correlated with BAL neutrophilia, duration and severity of cough symptoms                                                     |

|                                                                 |                                            |                                                                                     |                                                                                    |                                                                                                                                                                 |                                                                                                                                                                                  |                                                                                    |                                                                                                                                  |
|-----------------------------------------------------------------|--------------------------------------------|-------------------------------------------------------------------------------------|------------------------------------------------------------------------------------|-----------------------------------------------------------------------------------------------------------------------------------------------------------------|----------------------------------------------------------------------------------------------------------------------------------------------------------------------------------|------------------------------------------------------------------------------------|----------------------------------------------------------------------------------------------------------------------------------|
|                                                                 |                                            |                                                                                     | Controls=1<br>1;<br>Respective<br>mean 0.7,<br>2.0                                 |                                                                                                                                                                 |                                                                                                                                                                                  |                                                                                    |                                                                                                                                  |
| <b>Van der Gast{5715 } 2014</b><br><br><b>USA and Australia</b> | Multi-center, Resp OPD; cross sectional    | PBB, BE and CF                                                                      | PBB=12, BE=19; CF=25; Respective mean age (SD): 8.9 y (4.7), 2.3 (1.7), 12.5 (3.5) | Compare (a) the core and satellite microbiota in cohorts of children with different diseases; (b) the respiratory metacommunities pediatric and adult CF and BE | Similar resp sample core microbiota in the 3 diseases; microbiota from adults with CF and BE differed significantly from each other and from those of children with the same dis | BAL and sputum; traditional and non-traditional organisms described                |                                                                                                                                  |
| <b>Retrospective studies</b>                                    |                                            |                                                                                     |                                                                                    |                                                                                                                                                                 |                                                                                                                                                                                  |                                                                                    |                                                                                                                                  |
| <b>Priftis{5941} 2013</b><br><b>England, Greece</b>             | Resp OPD                                   | Children with chronic cough suspected of having PBB who had FB to confirm diagnosis | England=39, Greece=18; Median=4.8 y (range 0.9, 14.4)                              | (a) “determine specific serotypes of Spn and NTHi in BAL samples”; (b) compare the Spn serotypes between the 2 countries and Spn vaccination                    | PCV-13 Spn serotypes in all Greek BALs but only in 71.8% of English BALs (significantly different b/w countries)                                                                 | Greek BAL; Hi=61%, Spn=27.6%; Mcat=32% Sa=6%; English BAL restricted to Spn+ specs | Spn vaccination related with isolation of Spn serotypes not included in the vaccine<br><br>Recent or current AB use not reported |
| <b>Narang{5776} 2014</b><br><b>England</b>                      | Pediatric + Resp OPD; 50 consecutive notes | Suspected PBB (not defined)                                                         | 50; Median=2.9 y (IQR 1.7, 4.4)                                                    | To (a) “review the FB-BAL and CXR results”, (b) “assess the bacteria distribution across lung lobes”                                                            | Bacterial distribution in PBB was heterogeneous                                                                                                                                  | BAL Hi=50%, Spn=16% Mcat=28% Sa=22%                                                | Limiting sampling to 1-2 lobes would miss number of organisms (70% positive instead of 82%) but positive culture was undefined   |

**Supplementary Table S3.1**  
**Summary of bacteriology on children with chronic wet cough**

| <b>Ist Author, publication year; country</b> | <b><i>H. influenzae</i> (Hi)%</b> | <b><i>S. pneumoniae</i> (Spn)%</b> | <b><i>M. catarrhalis</i> (Mcat)%</b> | <b>Other</b>                                                  | <b>Quantitative or Non-quantitative culture</b> |
|----------------------------------------------|-----------------------------------|------------------------------------|--------------------------------------|---------------------------------------------------------------|-------------------------------------------------|
| Gedik{6062} 2015<br>Turkey                   | 43.3                              | 23.9                               | 23.9                                 | Sa=3%, S.py=6%                                                | NR                                              |
| De Baets{5959} 2012<br>Belgium               | 28                                | 13                                 | 51                                   | Sa=10%, <i>E.coli</i> =4%,<br><i>K.oxytoca</i> =1%,<br>P.a=1% | Non-quantitative                                |
| Zgherea{5093} 2012<br>USA                    | 49                                | 20                                 | 17                                   | Sa=12%                                                        | Quantitative                                    |
| Douros{5644} 2011<br>Greece                  | 37                                | 27                                 | 18                                   | Gram neg bact=12%<br>Sa=5%, Pa=5%                             | Quantitative                                    |
| Kompare{5095} 2011<br>USA                    | 56                                | 37                                 | 59                                   |                                                               | Quantitative                                    |
| Marchant{3095} 2006<br>Australia             | 47                                | 35                                 | 26                                   |                                                               | Quantitative                                    |
| Chang{3522} 2006<br>Australia                | 57.8                              | 57.8                               | 15.6                                 |                                                               | Quantitative                                    |

**Supplement Table S3.2**  
**Summary of bacteriology on children with PBB**

| <b>Ist Author,<br/>publication year;<br/>country</b> | <b><i>H. influenzae</i><br/>(Hi)%</b> | <b><i>S. pneumoniae</i><br/>(Spn)%</b> | <b><i>M. catarrhalis</i><br/>(Mcat)%</b> | <b>Other</b>                  | <b>&gt;=2<br/>organisms</b> | <b>Quantitative or<br/>Non-quantitative<br/>culture</b> |
|------------------------------------------------------|---------------------------------------|----------------------------------------|------------------------------------------|-------------------------------|-----------------------------|---------------------------------------------------------|
| Wang{6061} 2015<br>China                             | 47                                    | 37                                     | 0                                        | E.coli=6%,<br>Enterobacter=5% | NR                          | NR                                                      |
| Wurzel{5458} 2104<br>Australia                       | 72                                    | 39                                     | 43                                       |                               | 50%                         | Quantitative                                            |
| Pritchard{5767} 2014<br>England                      | 63                                    | 23                                     | 51                                       | Sa=19%                        | 48%                         | NR                                                      |
| Narang{5776} 2014<br>England                         | 50                                    | 16                                     | 28                                       | Sa=22%                        | 39%                         | Non-quantitative                                        |
| Wurzel{5712} 2014<br>Australia                       | Adv+: 68<br>AdV-:47                   | 35<br>22                               | 35<br>19                                 | Sa=10.2%                      | NR                          | Quantitative<br>*some cohort had BE                     |
| Van de Gast{5715}<br>2014, Australia                 | 50                                    | NR                                     | NR                                       | Sa=16%                        | NR                          | Quantitative<br>*PBB cohort only                        |
| Priftis{5941} 2013<br>Greece and England             | Greek grp: 61                         | 27.6                                   | 32                                       | Sa=6%                         | 39%                         | Quantitative                                            |
| Marchant{5280} 2012<br>Australia                     | 38                                    | 24                                     | 19                                       |                               | NR                          | Quantitative                                            |
| Marchant{4395} 2008<br>Australia                     | 45                                    | 32                                     | 24                                       |                               | NR                          | Quantitative                                            |
| Donnelly{3644} 2007<br>England                       | 81                                    | 37                                     | NR                                       |                               | 30%                         | Cough swab n=50<br>BAL n=19                             |

**Supplement Table S4.1**

**Studies on children with PBB that included viruses present in lower airways** [modified with permission from Chest 20016;149:120-42,{6008}  
Chest 2016;149:106-19{5954} and Pediatric Pulmonology 2016{5970}]

| First author, publication yr, country | Setting                                  | Inclusion criteria; Exclusion                                                | N; Age;                                                                                                                            | Main aim(s)                                                                                                                                            | BAL Microbiology                                                                                             | BAL Viruses                                                                                                                                                       | Comments                                                                                                                                                                                  |
|---------------------------------------|------------------------------------------|------------------------------------------------------------------------------|------------------------------------------------------------------------------------------------------------------------------------|--------------------------------------------------------------------------------------------------------------------------------------------------------|--------------------------------------------------------------------------------------------------------------|-------------------------------------------------------------------------------------------------------------------------------------------------------------------|-------------------------------------------------------------------------------------------------------------------------------------------------------------------------------------------|
| <b>Wurzel{57 12} 2014; Australia</b>  | Single center, Resp OPD; cross-sectional | PBB=clinical def; BE=Dx on CT scan                                           | PBB=159, BE=112; Median (IQR) age: PBB with AdV=17mo (12-22), PBB without AdV=26mo (15-56)<br><br>** BE and PBB children in cohort | To identify: (a) the prevalence of AdV; (b) diversity of genotypes and species (c) whether presence of AdV increased the odds of bacterial coinfection | In AdV+ grp<br>Hi=68%<br>Spn=35%<br>Mcat=35%<br><br>In AdV- grp<br>Hi=47%<br>Spn=22%<br>Mcat=19%<br>Sa=10.2% | HAdV-C was the major species detected in 96% HAdV+ children<br><br>Younger age risk factor for HAdV+ infection                                                    | Lower airway bacterial infection, (with Hi, Mcat and Spn, but not Sa) increased in those with AdV<br>This association disappeared with adjustment for age in multiple logistic regression |
| <b>Wurzel{54 58} 2014; Australia</b>  | Single center, Resp OPD; cross-sectional | <b>PBB=clinical def;</b><br>Controls=chronic resp symptoms, but no PBB, CSLD | <b>PBB=104,</b><br>Controls=49;<br><br>median age (IQR)=19mo (12-30), and 20mo (8-63)                                              | To provide extensive clinical, laboratory, and BAL characterization of PBB                                                                             | In PBB grp<br>Hi=72%<br>Spn=39%<br>Mcat=43%                                                                  | HAdV=23%;<br>Any virus=38%<br>Subset had extended viral panel (n=27 PBB) 67% +ve for any virus; rhinovirus (n=11, 41%), human bocavirus (n=1, 4%), HCoV (n=1, 4%) | Children with PBB more likely to have co-infection Hi and HAdV (p=0.001)                                                                                                                  |

**Supplement Table S5.1a**  
**Summary of BAL cellularity on children with PBB\***

| Ist Author, publication year; country | Neutrophil % in BAL (IQR) | TCC in BAL X 10 <sup>6</sup> /L | Comment                                     |
|---------------------------------------|---------------------------|---------------------------------|---------------------------------------------|
| Hodge{5952} 2016 Australia            | 25.5<br>(5,58)            | 188<br>(94,411)                 | E 0%,<br>No diff E and L with control group |
| Wang{6061} 2015 China                 | 29.2<br>(+/- 30.2)        | NR                              | No diff E and L with non-PBB grp            |
| Baines{5693} 2014 Australia           | 34<br>(10,44)             | 365<br>(196,632)                | L increased in PBB grp<br>125 (IQR 7,22)    |
| Wurzel{5458} 2014a Australia          | 44<br>(19,66)             | NR                              | No diff E and L with control grp            |
| Marchant{5280} 2012 Australia         | 38.5<br>(13,58)           | 426<br>(196,632)                | Rx grp listed; placebo similar              |
| Chang{5188} 2012 Australia            | 41.5<br>(18,7,69)         | 305<br>(157,498)                | E 0%,<br>No diff E and L with control group |
| Marchant{4395} 2008 Australia         | 43<br>(11, 75.5)          | 372.5<br>(199.5, 1050)          |                                             |
| Marchant{3095} 2006 Australia         | 40<br>(10,73)             | 350<br>(233, 1000)              |                                             |

\*Donnelly{3644} (England) also found “BAL cellularity dominated by neutrophils” not specified



**Supplement Table S5.1b: Studies involving children with protracted bacterial bronchitis and association with pathobiology: risk factors, underlying mechanisms, immunity and cellular pathways**

[modified with permission from Chest 20016;149:120-42,{6008} Chest 2016;149:106-19{5954} and Pediatric Pulmonology 2016{5970}]

| 1 <sup>st</sup> author, publication yr; country | Setting ; Study design                   | Inclusion criteria; Exc or definitions                                                                                                                                                                                                         | No. enrolled, No. completed; Age                                                                                                                    | Main aim(s)                                                                                                                                                                                                                                                                             | Key findings on pathobiology PBB                                                                                                                                                                                                                                                                                                                                                                                                                         | Specimen; microbiology results, cell count and differential                                                                                                                                                                     |
|-------------------------------------------------|------------------------------------------|------------------------------------------------------------------------------------------------------------------------------------------------------------------------------------------------------------------------------------------------|-----------------------------------------------------------------------------------------------------------------------------------------------------|-----------------------------------------------------------------------------------------------------------------------------------------------------------------------------------------------------------------------------------------------------------------------------------------|----------------------------------------------------------------------------------------------------------------------------------------------------------------------------------------------------------------------------------------------------------------------------------------------------------------------------------------------------------------------------------------------------------------------------------------------------------|---------------------------------------------------------------------------------------------------------------------------------------------------------------------------------------------------------------------------------|
| <b>Marchant {4395} 2008; Australia</b>          | Single center, Resp OPD; cross-sectional | PBB=chronic wet cough (>3 w), BAL bacterial culture ( $\geq 10^5$ CFU/mL) & response to Abs (cough resolved 2 w); Other etiologies =other chronic cough aetiologies in cohort,{3095} Controls=children with stridor, but without chronic cough | <b>PBB=38</b> , other Dx=25, SR=22, controls=15; Respective median age (IQR): 2.4 y (0.9-4.2), 2.6 y (1.1, 9.6), 3.8 y (0.9, 6.8), 2.8 y (0.6, 9.8) | To: (a) describe the clinical profile, airway cellularity and promoters of neutrophilic inflammation in BAL of children with PBB compared to children with other etiologies and controls without cough, (b) explore selected innate immunity signaling receptors, specifically TLR-2,-4 | BAL in PBB group had significantly elevated total cell counts, airway neutrophilia, IL-8, and active MMP-9 compared to other groups; IL-8 0.67 ng/ml (cf controls 0.06) $p<0.0005$ ; MMP-9 active 7.25 ng/ml (cf controls 0.38) $p<0.0005$ ; IL-8 levels significantly correlated with BAL neutrophil% and MMP-9; TLR-2 and -4 mRNA relative expression ratio in BAL of PBB group was significantly higher than controls (p 0.013, p 0.009 respectively) | BAL:<br>Hi=45%, Spn=32%; Mcat=24%<br><br><u>Cell count:</u><br>TCC $\uparrow$ 372.5 (IQR 199.5,1050) $p=.002$<br><br>Neutro $\uparrow$ = 43% (IQR 11,75.5%) $p<.0005$<br><br>Macro $\downarrow$ = 42.5% (IQR, 11,79%) $p<.0005$ |
| <b>Chang{5188} 2012; Australia</b>              | Single center, Resp OPD; cross-sectional | PBB=chronic wet cough, response to ABs with resolution of cough within 2 w & absence of signs or symptoms of other dis; PBB well=previous                                                                                                      | <b>Current PBB=61</b> , PBB well=20, Controls=21; Respective mean age (SD) =2.5 y (2.3), 4.2 y (3.0), 2.2 y (2.8)                                   | To determine whether BAL levels of hBD2, SP-A, and MBL: (a) differed between children with current PBB, PBB well, and controls; and (b) related with airway                                                                                                                             | hBD2 and MBL levels in BAL were significantly higher in children with PBB compared with PBB well group and controls.<br><br>hBD2 levels were associated with airway infection and are related to airway neutrophilia                                                                                                                                                                                                                                     | BAL; microbiology NR<br><br>Current PBB Grp<br>TCC $\uparrow$ 305 (IQR 157,498) $p=.0001$<br><br>Neutro $\uparrow$ = 41.5% (IQR                                                                                                 |

|                               |                                                        |                                                                                                       |                                                                                       |                                                                            |                                                                                                                                                                                                                                                                                                                  |                                                                                                                                                                                                                                                                                                                             |
|-------------------------------|--------------------------------------------------------|-------------------------------------------------------------------------------------------------------|---------------------------------------------------------------------------------------|----------------------------------------------------------------------------|------------------------------------------------------------------------------------------------------------------------------------------------------------------------------------------------------------------------------------------------------------------------------------------------------------------|-----------------------------------------------------------------------------------------------------------------------------------------------------------------------------------------------------------------------------------------------------------------------------------------------------------------------------|
|                               |                                                        | PBB, but no cough when FB done                                                                        |                                                                                       | neutrophilia and endobronchial infection                                   | and MBL<br>SP-A levels in the BAL and cytokine production of stimulated BAL cells similar between groups.                                                                                                                                                                                                        | 18.7,69%) p<.0001<br>Macro ↓= 45.5% (IQR, 26,68.5%) p<.0001<br>Eos and Lymph % no diff                                                                                                                                                                                                                                      |
| Wurzel{54 58} 2014; Australia | Single center, Resp OPD; cross-sectional Retrospective | <b>PBB=clinical def;</b> Controls=chronic resp symptoms, but no PBB, CSLD                             | <b>PBB=104,</b> Controls=49; median age (IQR)=19mo (12-30), and 20mo (8-63)           | To provide extensive clinical, laboratory, and BAL characterization of PBB | Risk factor for PBB: attendance at daycare (p=0.001 cf control group); Normal IgG, IgA, IgM, IgG subclasses, and vaccine responses (Hib and tetanus vaccines); Normal propensity to atopy (IgE and RAST normal); Elevated NK-cell levels: median CD56 and CD16 natural killer (NK) cell levels increased for age | <u>BAL micro</u> ( $\geq 10^4$ cfu/ml): In PBB grp; Hi=72%, Spn=39%; Mcat=43%; HAdV=23%; Any virus=38%<br><u>Cell count:</u> Neutrophils ↑ = 42% (IQR 19-66%) p<0.001 cf controls 4%<br>Neutrophils higher in HAdV+ 43% vs 16% (p=0.044); Macro ↓= 45% (IQR, 24-68%) p<.001<br>No diff Eos and Lymph<br>Eos: 0% both groups |
| Wang{606 1} 2015; China       | Single centre, Hospitalised, retrosp                   | <b>Chronic cough (&gt;4 w)</b> without acute lower resp infection and no response to conventional Rx. | 66 with wet cough of which <b>50 had PBB;</b> median age=10 mo (5.8–14 <sup>3</sup> ) | To describe the clinical characteristics children aged < 3 y with PBB      | IgA, IgM, IgG = normal; CD3+ and CD3+CD4+ cells lower in PBB group (p<0.01); CD19+, CD16+CD56+ and CD23+ cells were elevated ; All subtle difference in lymphocyte subsets (vs diseased controls). Lymph subsets did not relate to cough duration/severity                                                       | BAL ( $\geq 10^4$ cfu/ml); Hi=47%, Spn=37%, E. Coli=6%<br>Enterobacter=5%<br><u>Cell count</u> Neutro ↑ = 29.2% (+/- 30.2, p<0.01 cf no-PBB)<br>Macro ↓= 61% (+/- 32.7%, p<0.01)<br>No diff Eos and Lymph                                                                                                                   |
| Hodge{59 52} 2016; Australia  | Single center, Resp OPD;                               | PBB-micro; Controls=no cough and FB undertaken for                                                    | <b>PBB=13,</b> BE=55, controls=13. Median ages                                        | (a) Quantify phagocytosis of airway apoptotic cells and NTHi by            | Macrophage phagocytic capacity significantly lower in PBB and BE c.f. controls (p=0.003 and <0.001 for                                                                                                                                                                                                           | BAL data: Micro – NTHi in BAL n=5 PBB (38.4%), n=20 (36.4%) BE cf n=0 controls                                                                                                                                                                                                                                              |

|                               |                                                   |                                                                                                                                          |                                                                                                                          |                                                                                                                                                                                             |                                                                                                                                                                                                                                                                                                                                                                                                                                                                                                                                                                                         |                                                                                                                                                                                                               |
|-------------------------------|---------------------------------------------------|------------------------------------------------------------------------------------------------------------------------------------------|--------------------------------------------------------------------------------------------------------------------------|---------------------------------------------------------------------------------------------------------------------------------------------------------------------------------------------|-----------------------------------------------------------------------------------------------------------------------------------------------------------------------------------------------------------------------------------------------------------------------------------------------------------------------------------------------------------------------------------------------------------------------------------------------------------------------------------------------------------------------------------------------------------------------------------------|---------------------------------------------------------------------------------------------------------------------------------------------------------------------------------------------------------------|
|                               | cross-sectional                                   | other reasons (e.g. stridor); BE=CT defined with clinical symptoms                                                                       | and IQR: PBB=6.5 mo (1.6, 14) BE=22 mo (14, 33) Controls=5.5 (4, 9.9)                                                    | alveolar macrophages in children with PBB and BE; (b) Determine if phagocytic capacity was associated with clinical or demographic variables, and differing patterns of airway inflammation | efferocytosis and 0.041 and 0.004 for phagocytosis of NTHi; PBB and BE respectively); Median phagocytosis of NTHi: BE=13.7% (IQR 11-16%) PBB=16% (11-16%), controls=19.0% (13-21%); Median efferocytosis: BE=14.1% (10-16%), PBB=16.2% (14-17%), controls=18.1% (16-21%); IL-1 $\beta$ levels $\uparrow$ in BE and PBB groups (cf controls). IL-1 $\beta$ levels significantly correlated BAL %neutrophil (r=0.93 p=0.0001). Negative, but non-significant correlations between IL-1 $\beta$ and phagocytosis of apoptotic cells or NTHi (r= -0.37 p=0.080, -0.43 p=0.099 respectively) | <u>BAL Cell count PBB:</u><br>TCC 188 (IQR 94,411)<br><br>Neutrophils $\uparrow$ = 25.5% (IQR 5,58%) p=.039<br><br>Macro $\downarrow$ = 50% (IQR 21,81%) p=0.002<br><br>No diff Eos and Lymph E 0% all groups |
| Baines{56 93} 2014; Australia | Single center, Resp OPD; exp & validation cohorts | Children with PBB= history of chronic (>4 w) wet cough and a response to AB with cough resolution within 2 w in the absence of signs and | Exp: <b>PBB=21</b> ; Controls=33; Respective mean age=2.3 and 9.7 y; Validation: <b>PBB=36</b> ; Controls=11; Respective | To evaluate the IL-1 and TNF- $\alpha$ /NF- $\kappa$ B pathways and mediators in 2 cohorts of PBB and control children                                                                      | PBB = $\uparrow$ IL-1 $\beta$ , $\alpha$ -defensin gene and protein expression; $\uparrow$ expression N chemokine receptor CXCR, $\uparrow$ IL-1RA protein in PBB; Activation of IL-1 signaling predicts PBB recurrence, IL-1 $\beta$ levels are correlated to duration of cough and BAL                                                                                                                                                                                                                                                                                                | BAL data: Micro – NR<br><br><u>BAL Cell count PBB:</u><br>TCC 365 (IQR 196,632)<br><br>Neutro $\uparrow$ = 34% (IQR 10,44%) p=.001                                                                            |

|                                      |                                          |                                                                                                                                                                                                                |                                                                              |                                                                                            |                                                                                                                                                                                                                                                                                                                                                                                                                                                                                                                            |                                                                                                                                                                                                                                                                                                             |
|--------------------------------------|------------------------------------------|----------------------------------------------------------------------------------------------------------------------------------------------------------------------------------------------------------------|------------------------------------------------------------------------------|--------------------------------------------------------------------------------------------|----------------------------------------------------------------------------------------------------------------------------------------------------------------------------------------------------------------------------------------------------------------------------------------------------------------------------------------------------------------------------------------------------------------------------------------------------------------------------------------------------------------------------|-------------------------------------------------------------------------------------------------------------------------------------------------------------------------------------------------------------------------------------------------------------------------------------------------------------|
|                                      |                                          | symptoms of other diseases.<br>Controls: age matched children undergoing gastroscopy or bronchoscopy without chronic cough or resp illness                                                                     | mean ages=2.0 and 0.7 y                                                      |                                                                                            | neutrophilia (r=0.29, p=0.049);<br>IL-1 pathway signalling molecule significantly higher at baseline in those with recurrent vs non-recurrent PBB;<br>Increased IL-1 $\beta$ pathway activation in PBB                                                                                                                                                                                                                                                                                                                     | Macro $\downarrow$ = 52% (IQR 43,79%)<br>p=.001<br><br>Lymph $\uparrow$ =12% (IQR 7,22)<br>p=.001<br><br>Eos= 0% all groups                                                                                                                                                                                 |
| Other potentially relevant studies   |                                          |                                                                                                                                                                                                                |                                                                              |                                                                                            |                                                                                                                                                                                                                                                                                                                                                                                                                                                                                                                            |                                                                                                                                                                                                                                                                                                             |
| Grissell{3159}<br>2007;<br>Australia | Single centre, Gastro OPD non-bronch BAL | Children undergoing upper GI endoscopy, cough questionnaire.<br>Exclusion: neurodevelopmental abn, underlying cardioresp dis, primary aspiration<br><br><b>*Group defined on +ve bacterial culture not PBB</b> | 69 children; 10 positive bacterial growth non-bronch BAL, control group n=59 | To examine the expression of neurokinins, neurotrophins and TLRs in the lungs of children. | Cough 90% with positive bacterial culture (p=0.001);<br>Evidence of neutrophilic airway inflammatory response including CXCR1 expression:<br>$\uparrow$ expression neutrophil chemokine receptor CXCR1 0.93 (cf controls 0.02 p=0.006) ,<br>$\uparrow$ IL-8 195.1 pg/ml (cf controls 52.94) p<0.018<br>$\uparrow$ MMP-9 active 2.8 ng/ml (cf controls 0.97) p<.0045<br>$\downarrow$ TAC1 143.1 (cf control 357.4 p=.0001) and $\downarrow$ TLR4 2.7 (cf controls 4.7 p=0.021)<br>$\uparrow$ TLR3 209.8 (cf 115.7, p=0.013) | <u>BAL micro:</u><br>In Postitive grp: Hi=10%, Spn=80%; Mcat=20%;<br><br><u>Non-bronch BAL cell count</u><br>+ve bacteria culture:<br><br>TCC 108<br>Neutrophils $\uparrow$ = 26% p=.0001<br>Macro $\downarrow$ = 66% p=.0001<br>Lymph $\uparrow$ =5% p=.005<br>Eos 0% all groups<br><br>Limitations: *n=10 |
| Pizzutto{5728}                       | Single centre,                           | Children for investigation of                                                                                                                                                                                  | n=80 children with CSLD                                                      | Identify features of innate, cell-mediated                                                 | CSLD grp >18 months:<br>$\downarrow$ IFN $\gamma$ in response to NTHi (cf                                                                                                                                                                                                                                                                                                                                                                                                                                                  | Hi=24%, Spn=5%;<br>Mcat=5%;Ps.a=2.5%,                                                                                                                                                                                                                                                                       |

|                    |                                       |                                                                                                                       |                                                                                           |                                                                                                               |                                                                                                                     |                                                                                      |
|--------------------|---------------------------------------|-----------------------------------------------------------------------------------------------------------------------|-------------------------------------------------------------------------------------------|---------------------------------------------------------------------------------------------------------------|---------------------------------------------------------------------------------------------------------------------|--------------------------------------------------------------------------------------|
| 2014;<br>Australia | Resp<br>OPD,<br>prosp<br>Cross<br>sec | chronic wet<br>cough. Healthy<br>controls: no acute<br>infection or<br>history chronic<br>illness<br><b>(NOT PBB)</b> | n=51 aged-<br>matched<br>healthy<br>controls<br>75% total<br>cohort (n=80)<br>ages <3.5 y | and humoral<br>immunity that may<br>increase<br>susceptibility to resp<br>infections in<br>children with CSLD | controls)<br>Altered cell-mediated immune<br>responses, <i>in vitro</i> , may<br>contribute to pathogenesis<br>CSLD | K. pneumoniae=1%<br>*NB: 45% on ABs at time<br>sampling<br><br>Cell differential: NR |
|--------------------|---------------------------------------|-----------------------------------------------------------------------------------------------------------------------|-------------------------------------------------------------------------------------------|---------------------------------------------------------------------------------------------------------------|---------------------------------------------------------------------------------------------------------------------|--------------------------------------------------------------------------------------|

**Supplement Table S5.2****Studies involving children with protracted bacterial bronchitis or chronic wet cough, and association with tracheomalacia (part KQ5)**

[modified with permission from Chest 20016;149:120-42,{6008} Chest 2016;149:106-19{5954} and Pediatric Pulmonology 2016{5970}]

| 1 <sup>st</sup> author, publication yr; country | Setting ; Study design                                 | Inclusion criteria; Exc or definitions                                                                                                | No. enrolled, No. completed; Age                                                                      | Main aim(s)                                                                      | BAL microbiology                                                                                   | Tracheomalacia findings                                                                                                                                                                                                                                                                                                    |
|-------------------------------------------------|--------------------------------------------------------|---------------------------------------------------------------------------------------------------------------------------------------|-------------------------------------------------------------------------------------------------------|----------------------------------------------------------------------------------|----------------------------------------------------------------------------------------------------|----------------------------------------------------------------------------------------------------------------------------------------------------------------------------------------------------------------------------------------------------------------------------------------------------------------------------|
| <b>Wang{606 1} 2015; China</b>                  | Single centre, Hospitalised, children's hosp, retro    | Chronic cough (>4 w) without acute lower resp infection and no response to conventional Rx.                                           | 66 with wet cough of which 50 had PBB; median age=10 mo (5.8–14 <sup>3</sup> )                        | To describe the clinical characteristics children aged < 3 y with PBB            | BAL ( $\geq 10^4$ cfu/ml); Hi=47%, Spn=37%, E. Coli=6% Enterobacter=5%                             | Total airway malacia n=22 (44% cases); Laryngomalacia=32%, tracheomalacia=14%, bronchomalacia=41% Laryngo-bronchomalacia=9%, tracheobronchomalacia=4% “The clinical manifestation, immune function, cellularity and bacterial culture of BALF from patients with airway malacia did not differ from those without malacia” |
| <b>Gedik{606 2} 2015, Turkey</b>                | Single center, pediatric or Allergy dept; Cohort prosp | Aged < 17 y, persistent cough >4 w.<br>Exc: known chronic resp, neuromuscular, growth, or cardiac problems, syndromes, or prematurity | n=563 (total cohort)<br><br><b>Wet cough n=85 had FB PBB diagnosed =67</b><br><br>Mean age=5.4 SD 3.8 | The evaluation of children with chronic cough and aged-based etiological factors | BAL micro: (n=67 +ve 79% wet cough)<br><br>Hi=43.2%<br>Spn=23.9%<br>Mcat=23.9%<br>Sa=3%<br>S.py=6% | Vascular ring (n=1) and TBM (n=3)                                                                                                                                                                                                                                                                                          |
| <b>Wurzel{54 58} 2014; Australia</b>            | Single center, Resp OPD;                               | <b>PBB=clinical def;</b> Controls=chronic resp symptoms, but no PBB,                                                                  | PBB=104, Controls=49; Respective median age                                                           | To provide extensive clinical, laboratory, and BAL characterization of PBB       | BAL; In PBB grp; Hi=72%, Spn=39%; Mcat=43%;                                                        | TBM in n= 71 (68%) compared to n=26 in control group (53%) p=0.068                                                                                                                                                                                                                                                         |

|                                                    |                                                                        |                                                                                                                                                                                                                            |                                                                                                                           |                                                                                                                                                                                                       |                                                                                             |                                                                                                                      |
|----------------------------------------------------|------------------------------------------------------------------------|----------------------------------------------------------------------------------------------------------------------------------------------------------------------------------------------------------------------------|---------------------------------------------------------------------------------------------------------------------------|-------------------------------------------------------------------------------------------------------------------------------------------------------------------------------------------------------|---------------------------------------------------------------------------------------------|----------------------------------------------------------------------------------------------------------------------|
|                                                    | cross-<br>sect<br>Prosp                                                | CSLD                                                                                                                                                                                                                       | (IQR)=19mo<br>(12-30), and<br>20mo (8-63)                                                                                 |                                                                                                                                                                                                       | AdV=23%;<br>Any virus=38%                                                                   |                                                                                                                      |
| <b>Marchant<br/>{5280}<br/>2012;<br/>Australia</b> | Single<br>center,<br>Pediatr<br>ic and<br>resp<br>OPD;<br>RCT<br>prosp | Aged 0.5-18 y,<br>doctor observed<br><b>wet cough &gt;3 w</b> ;<br>Exc: chronic lung,<br>cardiac or neuro-<br>developmental<br>disorders, ABs in<br>last 2 w or if<br>acutely unwell                                       | 50, 3 lost to<br>FU that were<br>analyzed as<br>failures.<br>Mean=1.8 y<br>for Rx gp and<br>2.8 y<br>for placebo<br>group | Efficacy of 2 w of oral<br>amox-clav (compared<br>with placebo) in<br>achieving cough<br>resolution in children<br>with chronic wet cough                                                             | BAL;<br>Hi=38%, Spn=24%;<br>Mcat=19%                                                        | BAL in subgroup (n=37)<br><br>Of those without total clinical<br>resolution in 2 w trial >50% had TM<br>or BM or TBM |
| <b>Zgherea{5<br/>093}<br/>2012;<br/>USA</b>        | Resp<br>OPD;<br>Retro                                                  | <b>Chronic wet<br/>cough &gt;4 weeks</b> ,<br>*children ages 0-3<br>years (majority<br>results)                                                                                                                            | n=197;<br>n=108 0-3 y,<br>n=71 3-7 y,<br>n=18 >7 y                                                                        | Review of<br>bronchoscopy and BAL<br>results                                                                                                                                                          | BAL growth 91%<br>with purulent<br>bronchitis<br><br>Hi=49%; Spn=20%<br>Mcat=12%;<br>Sa=12% | Laryno/tracheomalacia n=33 (30.3%)<br>0-3 y.<br><br>TM n=15 (14%),<br>0-3 y age;<br><br>Rates in older age grps NR   |
| <b>Kompare{<br/>5095}<br/>2011;<br/>USA</b>        | Resp<br>&<br>allergy<br>OPD ;<br>retro                                 | <b>Protracted<br/>Cough (n=51),<br/>wheeze (n=27) or<br/>noisy breathing<br/>(n=17) (n=27 two<br/>symp, n=3 three<br/>symp) for &gt;1mo</b> ,<br>BAL ( $\geq 10^4$<br>CFU/mL) and<br>response to $\geq 2$ w<br>AB Rx (PBB) | n=70;<br>Summary age<br>NR                                                                                                | Review all BAL ( $\geq 10^4$<br>CFU/mL) cultures of<br>children aged <5 y with<br>cough, wheeze or noisy<br>breathing for >1mo<br>without other diagnoses<br>so as to determine if<br>PBB was present | BAL micro:<br>Hi=56%<br>Spn=37%<br>Mcat=59%                                                 | BM n=30 (43%)<br>TM n=14 (20%)<br>TBM n=8 (11%)<br><br><b>Total n=52 (74%)</b>                                       |
| <b>Douros{50<br/>27} 2011,<br/>Greece</b>          | Allergy-<br>Resp<br>OPD;                                               | Chronic (>6 w)<br>wet cough with<br>FB undertaken for                                                                                                                                                                      | n=93;<br>Mean=5.8 y<br>SD 3.6                                                                                             | In children with chronic<br>wet cough: (a)<br>Comparison of chest                                                                                                                                     | Quantitative BAL<br>( $\geq 10^4$ cfu/ml)<br>Hi=37%, Spn=27%;                               | BM n=39 (42%)                                                                                                        |



|                                          |                                                             |                                                                                          |                                                                                |                                                                                                                                                                 |                                                                                                                                   |                                                                                                                                                    |
|------------------------------------------|-------------------------------------------------------------|------------------------------------------------------------------------------------------|--------------------------------------------------------------------------------|-----------------------------------------------------------------------------------------------------------------------------------------------------------------|-----------------------------------------------------------------------------------------------------------------------------------|----------------------------------------------------------------------------------------------------------------------------------------------------|
|                                          | Retro                                                       | criteria++<br>Exc: CF, immune-deficiency,<br>neuromuscular,<br>aspiration                |                                                                                | CT and FB in detecting<br>airway abnormalities,<br>(b) explore radiologic<br>and FB/BAL<br>associations                                                         | Mcat=18%<br>Gram negative<br>bacteria=12%;<br>Sa=5%<br>Pa=5%                                                                      |                                                                                                                                                    |
| Donnelly{<br>3644}<br>2007;<br>England   | Resp<br>OPD;<br>review<br>of<br>clinic<br>letters;<br>retro | Persistent, wet<br>cough present for<br>1mo that resolved<br>with “appropriate”<br>AB Rx | n=81;<br>Median=3.8 y<br>(range 0.4,<br>14.8)                                  | Review the outcomes in<br>81 randomly selected<br>patients diagnosed with<br>PBB                                                                                | Cough swab (n=51).<br>Of infected<br>specimens (>50%):<br>Hi=81%; Spn=37%<br>(both in 30%);<br>BAL n=19                           | Malacia 2/19 who had FB (10.5%)<br><br>Note: Details on culture not detailed<br>but reported to be similar to cough<br>swabs and neutron dominated |
| Marchant<br>{3095}<br>2006;<br>Australia | Single<br>center,<br>Resp<br>OPD;<br>prosp                  | >3 w cough, age<br><18 y and newly<br>referred<br>Exc: NR                                | No. with<br>PBB=43;<br>Median age of<br>whole<br>cohort=2.6 y<br>(IQR 1.2-6.9) | In children with chronic<br>cough, to; (a) evaluate<br>the use of an adult-<br>based algorithmic<br>approach in the<br>management, (b)<br>describe the etiology | BAL median total<br>cell count and<br>neutrophil% in PBB<br>(350 x10 <sup>6</sup> /L, 40%)<br>Micro: Hi =47%,<br>Spn=35%, cat=26% | Tracheomalacia found as secondary<br>diagnosis in 33% of cohort with<br>chronic cough (n=96, 89% of cohort<br>had wet cough)                       |
| Chang{19<br>20} 2002,<br>Australia       | Resp<br>OPD,<br>retro                                       | CSLD (>4 mo wet<br>cough),<br>indigenous<br>children                                     | n=65;<br>(n=33 FB)<br>Med age=3.8 y<br>(*n=28 of 33<br>radiological<br>BE)     | Children prospectively<br>identified and charts<br>reviewed<br>retrospectively to<br>describe airway<br>abnormalities and relate<br>to HRCT chest               | NR                                                                                                                                | Structural airway lesions in 39.7% of<br>n=33 who had bronchoscopy                                                                                 |
| Thomson{<br>1698}<br>2002,<br>Australia  | Resp<br>OPD                                                 | Chronic cough > 4<br>weeks                                                               | n=49<br>Med age=39<br>mo (range 4<br>mo-14 y)                                  | Children prospectively<br>identified and chart<br>information collected                                                                                         | NR                                                                                                                                | Structural airway lesion 47%                                                                                                                       |

### Supplement Table S6: Studies involving KQ6

In children with chronic wet or productive cough unrelated to an underlying dis and without any specific cough pointers (e.g. coughing with feeding, digital clubbing, etc.); (a) How effective are ABs in improving clinical outcomes (eg. cough resolution)? (b) What is the most suitable AB?

(c) For how long should ABs be prescribed? (d) Does Rx dose and duration influence risk of recurrence in the following 12-months?

| Randomised, controlled trials                           |                                                                                                   |                                                                                                                                            |                                                       |                                                                                                                                                   |                                                                                                                                        |                                                                                                                                                   |                                                                                                                                                                                                    |
|---------------------------------------------------------|---------------------------------------------------------------------------------------------------|--------------------------------------------------------------------------------------------------------------------------------------------|-------------------------------------------------------|---------------------------------------------------------------------------------------------------------------------------------------------------|----------------------------------------------------------------------------------------------------------------------------------------|---------------------------------------------------------------------------------------------------------------------------------------------------|----------------------------------------------------------------------------------------------------------------------------------------------------------------------------------------------------|
| 1 <sup>st</sup> author,<br>publication year,<br>country | Setting;<br>Study<br>design                                                                       | Inclusion<br>criteria;<br>Exclusion (Excl)<br>or definitions                                                                               | Intervention                                          | No. enrolled,<br>No.<br>completed,<br>Follow-up<br>duration,<br>Age                                                                               | Main aim(s) of<br>study                                                                                                                | Primary<br>findings<br>relating to KQ                                                                                                             | Duration of<br>cough and other<br>comments                                                                                                                                                         |
| <b>Darelid{2263},<br/>1993, Sweden</b>                  | 3<br>Paediatric<br>OPD<br><br>Open label<br>RCT                                                   | Age 0.5-6 y<br><br>Cough >10days<br><br>Exc:<br>Asthma/allergy,<br>cardiac, AOM,<br>tonsillitis,<br>pneumonia or<br>suspected<br>pertussis | Erythromycin<br>50mg/kg bid<br>for 7days              | 88, 1 with-<br>drawn from<br>vomiting AB;<br>3mo follow-<br>up<br><br>Modal age<br>group; 13-24<br>mo                                             | If<br>erythromycin<br>resolved cough<br>on day7 based<br>on<br>questionnaire<br>and doctor's<br>judgement                              | 35/41 (87%)<br>cured in<br>erythromycin<br>group vs 17/47<br>(36%) controls<br>(p<.01)                                                            | 50% had cough<br>>21days; 4 had<br>pertussis;<br>No recurrences in<br>3 mo follow-up;<br>Worse by day14<br>in 2 Rx and 14<br>controls (p<0.01);<br>7 cases of AOM in<br>controls only<br>(p<0.05). |
| <b>Gottfarb{1877}<br/>1994,<br/>Sweden</b>              | 3<br>Paediatric<br>outpatient<br>clinics<br><br>Double-<br>blind,<br>placebo<br>containing<br>RCT | LRTI with cough<br>>10days<br><br>Excl:<br>AOM, pneumonia<br>or suspected<br>pertussis                                                     | Amoxycillin-<br>clavulanate<br>20mg/kg/d<br>for 7days | 52 children,<br>but just 37<br>children in<br>analysis<br>(12 pertussis,<br>2 lost to<br>follow-up, 1<br>refused Rx)<br><br>14d FU<br>Median age: | To evaluate<br>nasopharyngeal<br>organisms in<br>children with<br>persistent<br>cough and<br>effects of<br>amoxycillin-<br>clavulanate | AB treated<br>group had better<br>clinical<br>recovery by<br>doctor's<br>assessment<br>(p=.02) and<br>parental opinion<br>(71% vs 22%;<br>p=.002) | Mean cough for<br>3-4 w.<br><br>12 cases of<br>pertussis<br><br>Low AB dose<br>used.                                                                                                               |

|                                       |                                                                                         |                                                                                                                                                                        |                                                  |                                                                                                                                         |                                                                                     |                                                                              |                                                                                                                                                                                                                                                  |
|---------------------------------------|-----------------------------------------------------------------------------------------|------------------------------------------------------------------------------------------------------------------------------------------------------------------------|--------------------------------------------------|-----------------------------------------------------------------------------------------------------------------------------------------|-------------------------------------------------------------------------------------|------------------------------------------------------------------------------|--------------------------------------------------------------------------------------------------------------------------------------------------------------------------------------------------------------------------------------------------|
|                                       |                                                                                         |                                                                                                                                                                        |                                                  | Rx arm: 2.6 y; controls: 2.7 y (range 7 mo-7 y)                                                                                         |                                                                                     |                                                                              |                                                                                                                                                                                                                                                  |
| <b>Marchant{5280} 2012, Australia</b> | Single centre, Paediatric outpatient clinic<br><br>Double-blind, placebo containing RCT | Age 0.5-17 y<br><br>Wet cough >3 w<br><br>Excl;<br>Neuromuscular, heart or lung disorders, ex-preterm infants, ABs in prior 2 w, penicillin allergy, or acutely unwell | Amoxycillin-clavulanate 22.5mg/kg bid for 14days | 50 subjects, 3 lost to FU<br><br>14 d FU post-intervention<br><br>Median (IQR) age 1.75 (0.9,4.6) (Rx) and 2.8 (0.95, 5.25) (placebo) y | Assess the efficacy of 2 w of amoxycillin-clavulanate at achieving cough resolution | Cough resolution in 12 (48%) in AB group vs 4 (16%) in placebo group; p=.015 | Median (IQR) cough duration was 15 (8.5-59) (Rx group) and 11 (4.0-28) (placebo group) w respectively<br><br>BAL in 37 ( $\geq 10^5$ cfu/mL): Hi (14; 38%), Sp (9; 24%) and Mc (7; 19%)<br><br>Follow-up limited to just 14 d post-intervention. |

### Prospective, cohort studies

| 1 <sup>st</sup> author, publication year, country | Setting; Study design                                          | Inclusion criteria; Exclusion or definitions                                         | Intervention                                  | No. enrolled, Follow-up duration, Age                                   | Main aim(s) of study                                                    | Primary findings relating to KQ                                                            | Duration of cough and other comments                                                                                                |
|---------------------------------------------------|----------------------------------------------------------------|--------------------------------------------------------------------------------------|-----------------------------------------------|-------------------------------------------------------------------------|-------------------------------------------------------------------------|--------------------------------------------------------------------------------------------|-------------------------------------------------------------------------------------------------------------------------------------|
| <b>Marchant{3095} 2006, Australia</b>             | Single centre, Paediatric OPD clinic; Prospective cohort study | Age <18 y and >3 w cough<br><br>Excl:<br>Neuromuscular, heart or lung disorders, ex- | Amoxycillin-clavulanate 22.5mg/kg bid for 2 w | 108 children<br><br>Follow-up: at least 2 w<br><br>Median (IQR) age 2.6 | To describe the aetiology of chronic cough using a diagnostic algorithm | 43 (40%) had PBB, based on a chronic moist cough >3 w and cough resolution with 2 w of ABs | Median (IQR) cough duration was 6 (3-12) mo;<br>19/43 – probable PBB based on chronic wet cough, BAL cultures $10^{3-4}$ cfu/mL and |

|                                   |                                                                                                  |                                                                                                                                                                    |                                                                |                                                                                            |                    |                                                                                                                                                                         |                                                                                                                                              |
|-----------------------------------|--------------------------------------------------------------------------------------------------|--------------------------------------------------------------------------------------------------------------------------------------------------------------------|----------------------------------------------------------------|--------------------------------------------------------------------------------------------|--------------------|-------------------------------------------------------------------------------------------------------------------------------------------------------------------------|----------------------------------------------------------------------------------------------------------------------------------------------|
|                                   | June 2002-June 2004                                                                              | preterm infants                                                                                                                                                    |                                                                | (1.2- 6.9) y                                                                               |                    |                                                                                                                                                                         | needing >2 w ABs for cough resolution                                                                                                        |
| <b>Asilsoy{4030} 2008, Turkey</b> | Single centre, Children's Hospital<br><br>Prospective cohort study<br><br>November 2006-May 2007 | Presenting to Hospital with cough >4 w<br><br>Excl:<br>Neuromuscular, heart or lung disorders, ex-preterm infants or acute respiratory tract infection in last 4 w | 2006 ACCP guideline<br><br>Clarithromycin 15mg/kg/d for 10days | 108 children<br><br>Follow-up: at least 4 w<br><br>Mean (SD) age 8.44 (2.13); range 6-14 y | Evaluate guideline | 39 children had wet cough.<br>After 14d Abs, 25 (64%) had 'improved' cough, while 14 now had a dry cough, which in 10 recovered completely within 2-4 w following ICSs  | Mean (SD) cough duration 4.16 (4.94) mo<br><br>Variable response of wet cough to ABs, but no controls and a highly heterogeneous population. |
| <b>Karabel{5644} 2014, Turkey</b> | Single centre, Paediatric clinic<br><br>Prospective cohort study                                 | Chronic cough >4 w<br><br>Excl:<br>Neuromuscular, heart or lung disorders, ex-preterm infants or acute respiratory tract infection in last 4 w                     | 2006 ACCP guideline<br><br>Clarithromycin 15mg/kg/d for 10 d   | 270 children<br><br>Follow-up: 12 mo<br><br>Mean (SD) age 6.5 (2.3) y<br>Range 7 mo-17 y   | Evaluate guideline | 97 (36%) had a wet cough.<br><br>37 had a hx of recurrent bronchitis (22/37 (59%) had BE);<br>55 received ABs, but just 12/55 (22%) responded and were diagnosed as PBB | Cough duration – not reported<br><br>No controls, highly heterogeneous study population<br><br>Incomplete data presented.                    |
| <b>Usta{5929} 2014, Turkey</b>    | Single centre, Paediatric clinic;<br>Prospective cohort;<br>September 2009-September             | Chronic cough >8 w in children aged 5-16 y old<br>Excl:<br>Neuromuscular, heart or lung disorders, failure to thrive, ex-preterm infants,                          | 2008 BTS guideline<br><br>Clarithromycin 15mg/kg/d for 10days  | 156 children<br><br>Follow-up: 18 mo<br><br>Mean (SD) age 8.4 (2.6) y                      | Evaluate guideline | 42 (27%) had a wet cough<br><br>25 had both a dry and wet cough<br><br>23 with a wet cough and normal physical examination                                              | Mean (SD) cough duration 3.99 (3.21) mo<br><br>No controls, highly heterogeneous study population                                            |

|  |      |                                                          |  |  |  |                                                                                    |  |
|--|------|----------------------------------------------------------|--|--|--|------------------------------------------------------------------------------------|--|
|  | 2010 | active cigarette smoking or unable to perform spirometry |  |  |  | received ABs, cough in 19/23 (83%) resolved = PBB, while 2 had asthma and 2 had BE |  |
|--|------|----------------------------------------------------------|--|--|--|------------------------------------------------------------------------------------|--|

### Retrospective studies

| 1 <sup>st</sup> author, publication year, country | Setting; Study design                                                             | Inclusion criteria; Exclusion or definitions                                                                                                           | Intervention                                                          | No. enrolled, Follow-up duration, Age                                                                                                                                 | Main aim(s) of study                                    | Primary findings relating to KQ                                                                                                                                   | Duration of cough and other comments                                                                 |
|---------------------------------------------------|-----------------------------------------------------------------------------------|--------------------------------------------------------------------------------------------------------------------------------------------------------|-----------------------------------------------------------------------|-----------------------------------------------------------------------------------------------------------------------------------------------------------------------|---------------------------------------------------------|-------------------------------------------------------------------------------------------------------------------------------------------------------------------|------------------------------------------------------------------------------------------------------|
| <b>Smith{5958} 1985, USA</b>                      | Children's Hospital<br><br>Retrospective chart review<br><br>Jan 1980-August 1983 | Undergoing flexible bronchoscopy for respiratory symptoms<br><br>Excl;<br>Cystic fibrosis or other chronic lung disorder leading to chronic bronchitis | cefaclor, ampicillin, or trimethoprim-sulphamethoxazole               | 148 charts reviewed, 20 had chronic bronchitis on visual inspection (n=7) and/or biopsy (n=13), another 2 included on clinical grounds; Mean age 5.7 (range 0.4-14) y | Describe the features of chronic bronchitis in children | All had been diagnosed with poorly controlled asthma<br><br>11 received ABs on basis of bronchoscopy findings and 9 improved vs only 6/11 who did not receive ABs | Cough duration of 3 mo to 3 y<br><br>Non-systematic approach to Rx<br><br>Outcomes were not defined. |
| <b>Donnelly {3644} 2007, UK</b>                   | Single Children's Hospital<br><br>Retrospective                                   | PBB as defined by persistent wet cough >4 w that resolves with "appropriate"                                                                           | Amoxycillin-clavulanate 20mg/kg bid for 2 w<br><br>If cough resolved, | 81 children<br><br>Previous 5 y<br><br>Median age                                                                                                                     | Outcomes following Rx                                   | 41 (51%) completely free of cough symptoms after 2 AB courses                                                                                                     | 48 (59%) had cough duration >1 y;<br><br>Uncontrolled observations;                                  |

|                                    |                                                                                                                   |                                                                                                                                                                                                |                                                                                                                                           |                                                              |                                                                                                     |                                                                                                                                                                                 |                                                                                                                                                                                      |
|------------------------------------|-------------------------------------------------------------------------------------------------------------------|------------------------------------------------------------------------------------------------------------------------------------------------------------------------------------------------|-------------------------------------------------------------------------------------------------------------------------------------------|--------------------------------------------------------------|-----------------------------------------------------------------------------------------------------|---------------------------------------------------------------------------------------------------------------------------------------------------------------------------------|--------------------------------------------------------------------------------------------------------------------------------------------------------------------------------------|
|                                    | chart review from prior 5 y                                                                                       | ABs''<br><br>Exc:<br>Significant neurological disorders                                                                                                                                        | then AB continued for another 4-6 w                                                                                                       | 3 y 9 mo (range 5 mo to 14 y)                                |                                                                                                     | 11 (13%) required $\geq 6$ AB courses or had continuous Rx for at least one winter                                                                                              | Originally all diagnosed as PBB, 4 later had HRCT scan evidence of BE, which resolved in 2 children who had become asymptomatic.                                                     |
| <b>Kompare{5095} 2012, USA</b>     | Single Children's Hospital<br><br>Retrospective bronchoscopy database review<br><br>1999-2009                     | Children <5 y with resp symptoms for >4 w without other diagnoses and BAL cultures $>10^4$ cfu/mL of respiratory bacterial pathogens; Excl: Asthma, cystic fibrosis and other chronic diseases | Amoxycillin-clavulanate (n=33)<br>Trimethoprim-sulphamethoxazole (n=16)<br>Unspecified other agents (n=12).<br><br>AB duration $\geq 2$ w | 70 children<br><br>AB and outcome data for 61 (87%) children | Describe BAL findings in children with unexplained chronic respiratory symptoms that included cough | Symptoms resolved in 60/61 children<br><br>Recurrence of symptoms requiring repeated Rx courses occurred in 43 (70%) cases with good effect (nature of symptoms and Rx unknown) | Median symptom duration 5 (range 1-60) mo<br><br>Uncontrolled observations and incomplete data<br><br>Sp, Hi, Mc were the most common bacteria in BAL<br><br>Airway malacia in 74%   |
| <b>Goyal{5600} 2014, Australia</b> | Single Children's Hospital<br><br>Retrospective radiology database and chart review<br><br>April 2010-August 2012 | Referred children with chronic wet cough >4 w and undergoing multi-detector CT scans<br><br>Excl;<br>Asthma, cystic fibrosis, known                                                            | Amoxycillin-clavulanate for $\geq 4$ w                                                                                                    | 144<br><br>Median age 56.9 (range 3-204) mo                  | To determine if a poor response to $\geq 4$ w of ABs predicts risk of BE                            | 106 had CT scan evidence of BE.<br><br>Of 105 with persistent cough despite $\geq 4$ w of ABs, 88 (84%) had BE, while of 24 children whose cough resolved, only 6 (25%) had     | Median cough duration 12 (range 1.5-144) mo<br><br><b>OR</b> for BE:<br>Indigenous 5.9 (95%CI 1.2, 29), poor response to ABs 21 (95%CI 5.4, 82), cough $\geq 12$ mo 3.0 (95%CI 0.97, |

|                                 |                                                                        |                                                                              |                                                                                                                                     |                                                                                                               |                           |                                                                                                                                                                                           |                                                                                                                                        |
|---------------------------------|------------------------------------------------------------------------|------------------------------------------------------------------------------|-------------------------------------------------------------------------------------------------------------------------------------|---------------------------------------------------------------------------------------------------------------|---------------------------|-------------------------------------------------------------------------------------------------------------------------------------------------------------------------------------------|----------------------------------------------------------------------------------------------------------------------------------------|
|                                 |                                                                        | BE, scans requested by oncology, surgical, intensive care and trauma teams   |                                                                                                                                     |                                                                                                               |                           | scan evidence of BE                                                                                                                                                                       | 9.3);<br>Poor response to ABs as a predictor of BE: PPV 84% (95%CI 75, 90); NPV 75% (95%CI 53, 90)                                     |
| <b>Pritchard{5767} 2015, UK</b> | Children's Hospital<br><br>Retrospective chart review<br><br>2011-2013 | Children diagnosed with PBB between<br><br>Median (IQR) age 2.7 (1.5- 4.0) y | Amoxycillin-clavulanate (n=27),<br><br>Others: flucloxacillin, amoxycillin or clarithromycin (n=17)<br><br>Course duration of 6-8 w | 44, 1 lost to follow-up; Median (IQR) follow-up duration 11.3 (8.3-14.7) mo; Median (IQR) age 2.7 (1.5-4.0) y | Cough resolution with ABs | 33/43 (77%) had complete response to initial AB, 25/33 (76%) had recurrent episodes, and of these, 9 (27%) were given prophylactic amox-clav, including 3 (9%) with $\geq 3$ PBB episodes | Median (IQR) cough duration 11.0 (9.0-14.7) mo<br><br>10/43 (23%) did not respond to initial ABs, thus by definition did not have PBB. |

**Supplement Table S7: Studies involving KQ7**

In children aged ≤18-years with chronic wet or productive cough unrelated to an underlying dis and without any specific cough pointers (e.g. coughing with feeding, digital clubbing, etc.), (a) What is the role of prophylactic ABs? (b) What is the risk of AB resistance? and (c) How should recurrences be managed?

| Retrospective studies                             |                                                                             |                                                                                                                                   |                                                                                                                                     |                                                                                                                           |                           |                                                                                                                                                                                                    |                                                                                                                                                                                                 |
|---------------------------------------------------|-----------------------------------------------------------------------------|-----------------------------------------------------------------------------------------------------------------------------------|-------------------------------------------------------------------------------------------------------------------------------------|---------------------------------------------------------------------------------------------------------------------------|---------------------------|----------------------------------------------------------------------------------------------------------------------------------------------------------------------------------------------------|-------------------------------------------------------------------------------------------------------------------------------------------------------------------------------------------------|
| 1 <sup>st</sup> author, publication year, country | Setting; Study design                                                       | Inclusion criteria; Exclusion or definitions                                                                                      | Assessed treatment(s)                                                                                                               | No. enrolled, Follow-up duration, Age                                                                                     | Main aim(s) of study      | Primary findings relating to KQ                                                                                                                                                                    | Duration of cough, Rx response and other comments                                                                                                                                               |
| <b>Donnelly{3644}</b> 2007, UK                    | Single Children's Hospital<br><br>Retrospective chart review from prior 5 y | PBB as defined by persistent wet cough >4 w that resolves with "appropriate" ABs"<br><br>Excl: Significant neurological disorders | Amoxycillin-clavulanate 20mg/kg bid for 2 w<br><br>If cough resolved, then AB continued for another 4-6 w                           | 81 children<br><br>Previous 5 y<br><br>Median age 3 y 9 mo (range 5 mo to 14 y)                                           | Outcomes following Rx     | 11 (13%) required ≥6 AB courses or had continuous Rx for at least one winter<br><br>No AB or AB resistance details provided                                                                        | 48 (59%) had cough duration >1 y; No controls, few details on when cultures taken ; 4/81 children later had HRCT scan evidence of BE, which resolved in 2 children who had become asymptomatic  |
| <b>Pritchard{5767}</b> 2015, UK                   | Children's Hospital<br><br>Retrospective chart review<br><br>2011-2013      | Children diagnosed with PBB between<br><br>Median (IQR) age 2.7 (1.5- 4.0) y                                                      | Amoxycillin-clavulanate (n=27),<br><br>Others: flucloxacillin, amoxycillin or clarithromycin (n=17)<br><br>Course duration of 6-8 w | 44, 1 lost to follow-up<br><br>Median (IQR) follow-up duration 11.3 (8.3-14.7) mo<br><br>Median (IQR) age 2.7 (1.5-4.0) y | Cough resolution with ABs | 33/43 (77%) had good response to initial ABs, but 25/33 (76%) had recurrent episodes, and of these, 9 (27%) were given prophylactic amoxycillin-clavulanate, including 3 (9%) with ≥3 PBB episodes | Median (IQR) cough duration 11.0 (9.0-14.7) mo<br><br>10/43 (23%) did not respond to initial ABs, thus by definition did not have PBB<br><br>No controls and no AB resistance details provided. |



**Abbreviations:** AB=ABs; Abn=abnormality; ACCP=American College of Chest Physicians; AdV=adenovirus; Amox-clav=amoxicillin-clavulanate; BAL=bronchoalveolar lavage; BE=BE; CF=cystic fibrosis; CFU=colony-forming unit; Clarithro=clarithromycin; CSLD=chronic suppurative lung dis; CT=chest computed tomography; CXR=chest radiograph; d=d; DB=double blinded; Def=definition; Dis=dis; Dx=diagnosis; Exc=exclusion criteria; Exp=exploratory; FB=flexible bronchoscopy; FU=follow-up; mo=months; Gastro=gastroenterology; GI=gastrointestinal; GOR=gastro-oesophageal reflux; Hi=*Haemophilus influenzae*; HRCT=high-resolution computed tomography; ICS=inhaled corticosteroids; ICU=intensive care unit; IL=interleukin; IQR=interquartile range; KQs=key questions; MBL=mannose binding ligand; Mcat= *Moraxella catarrhalis*; Micro=microbiology; mo=months; Mx=management; N=number; ND=not defined; NF=nuclear factor; NR=not reported; NTHi=non-typeable *Haemophilus influenzae*; OPD=outpatients department; OR=Odds ratio; PBB=protracted bacterial bronchitis; PCD=primary ciliary dyskinesia; RCT=randomized control trial; Resp=Respiratory; Rx=Rx; Sa=*Staphylococcus aureus*; SD=standard deviation; SPA=surfactant protein A; Spn=*Streptococcus pneumoniae*; SR=spontaneous resolution; TLRs=toll-like receptors; TNF=tumour necrosis factor; w=week(s); y=year(s)

\*Not all children in cohort had PBB i.e. some had BE

^Unclear what these figures refer to as figure in the table differed from the text

Δ Included only if study termed the condition PBB or persistent bacterial bronchitis

#children who failed therapy included in numbers but those lost to FU were excluded

@Two studies{5444, 3521} that included the same children but reported on different outcomes were excluded from this systematic review

++ criteria used = “(1) recurrent pneumonia, (2) persistent (>1 month) atelectasis, (3) assessment of airway anatomy and dynamics when the wet-sounding cough also had a “brassy” quality, (4) clinical picture that was not compatible with HRCT scan findings, and (5) failure to respond to empiric antibiotic therapy and chest physiotherapy for 2 to 3 weeks”{5027}

## References

- 1 Chang AB, Oppenheimer JJ, Weinberger MM, Rubin BK, Irwin RS. Children with chronic wet or productive cough -Rx and investigations: a systematic review. *Chest* 2016; 149: 120-142.
- 2 Chang AB, Oppenheimer JJ, Weinberger MM, Weir KA, Rubin BK, Irwin RS. Use of management pathways or algorithms in children with chronic cough: systematic review. *Chest* 2016; 149: 106-119.
- 3 Chang AB, Upham JW, Masters IB, Redding GJ, Gibson PG, Marchant JM, Grimwood K. State of the art. Protracted bacterial bronchitis: the last decade and the road ahead. *Pediatr Pulmonol* 2016; 51: 225-242.
- 4 Asilsoy S, Bayram E, Agin H, Apa H, Can D, Gulle S, Altinoz S. Evaluation of chronic cough in children. *Chest* 2008; 134: 1122-1128.
- 5 Chang AB, Robertson CF, van Asperen PP et al. Children with chronic cough: when is watchful waiting appropriate? Development of likelihood ratios for assessing children with chronic cough. *Chest* 2015; 147: 745-753.
- 6 Darelid J, Lofgren S, Malmvall BE. Erythromycin Rx is beneficial for longstanding *Moraxella catarrhalis* associated cough in children. *Scand J Infect Dis* 1993; 25: 323-329.
- 7 Marchant JM, Morris P, Gaffney J, Chang AB. ABs for prolonged moist cough in children. *Cochrane Database of Systematic Review* 2005; Oct 19: Issue 4.
- 8 Gedik AH, Cakir E, Torun E et al. Evaluation of 563 children with chronic cough accompanied by a new clinical algorithm. *Ital J Pediatr* 2015; 41: 73.
- 9 Gottfarb P, Brauner A. Children with persistent cough--outcome with Rx and role of *Moraxella catarrhalis*? *Scand J Infect Dis* 1994; 26: 545-551.
- 10 Karabel M, Kelekci S, Karabel D, Gurkan MF. The evaluation of children with prolonged cough accompanied by American College of Chest Physicians guidelines. *Clin Respir J* 2014; 8: 152-159.
- 11 Chang AB, Robertson CF, van Asperen PP et al. A cough algorithm for chronic cough in children: a multicentre, randomized controlled study. *Pediatrics* 2013; 131: e1576-1583.

- 12 Marchant JM, Masters IB, Taylor SM, Cox NC, Seymour GJ, Chang AB. Evaluation and outcome of young children with chronic cough. *Chest* 2006; 129: 1132-1141.
- 13 Marchant JM, Masters IB, Champion A, Petsky HL, Chang AB. Randomised controlled trial of amoxycillin-clavulanate in children with chronic wet cough. *Thorax* 2012; 67: 689-693.
- 14 Usta GB, Asilsoy S, Durmaz C. The assessment and management of chronic cough in children according to the British Thoracic Society guidelines: descriptive, prospective, clinical trial. *Clin Respir J* 2014; 8: 330-337.
- 15 Shields MD, Bush A, Everard ML, McKenzie SA, Primhak R. British Thoracic Society Guidelines Recommendations for the assessment and management of cough in children. *Thorax* 2008; 63 Suppl 3: iii1-iii15.
- 16 Donnelly DE, Critchlow A, Everard ML. Outcomes in Children Treated for Persistent Bacterial Bronchitis. *Thorax* 2007; 62: 80-84.
- 17 Kompare M, Weinberger M. Protracted Bacterial Bronchitis in Young Children: Association with Airway Malacia. *J Pediatr* 2012; 160: 88-92.
- 18 Pritchard MG, Lenney W, Gilchrist FJ. Outcomes in children with protracted bacterial bronchitis confirmed by bronchoscopy. *Arch Dis Child* 2015; 100: 112.
- 19 Smith TF, Ireland TA, Zaatari GS, Gay BB, Zwiren GT, Andrew HG. Characteristics of children with endoscopically proved chronic bronchitis. *Am J Dis Child* 1985; 139: 1039-1044.
- 20 Wang Y, Hao C, Chi F et al. Clinical characteristics of protracted bacterial bronchitis in Chinese infants. *Sci Rep* 2015; 5: 13731.
- 21 Chang AB, Landau LI, van Asperen PP, Glasgow NJ, Robertson CF, Marchant JM, Mellis CM. The Thoracic Society of Australia and New Zealand. Position statement. Cough in children: definitions and clinical evaluation. *Med J Aust* 2006; 184: 398-403.
- 22 Chang AB, Glomb WB. Guidelines for evaluating chronic cough in pediatrics: ACCP Evidence-Based Clinical Practice Guidelines. *Chest* 2006; 129: 260S-283.
- 23 Gibson PG, Chang AB, Glasgow NJ et al. CICADA: Cough in Children and Adults: Diagnosis and Assessment. Australian Cough Guidelines summary statement. *Med J Aust* 2010; 192: 265-271.

- 24 Kohno S, Ishida T, Uchida Y et al. The Japanese Respiratory Society guidelines for management of cough. *Respirology* 2006; 11 Suppl 4: S135-S186.
- 25 Leconte S, Paulus D, Degryse J. Prolonged cough in children: a summary of the Belgian primary care clinical guideline. *Prim Care Respir J* 2008; 17: 206-211.
- 26 Lu Q. [Guideline for diagnosis and Rx of chronic cough in Chinese children]. *Zhonghua Er Ke Za Zhi* 2014; 52: 184-188.
- 27 Zacharasiewicz A, Eber E, Riedler J, Frischer T. [Consensus statement on the evaluation and therapy of chronic cough in children]. *Wien Klin Wochenschr* 2014; 126: 439-450.
- 28 Chang AB. State of the Art: Cough, cough receptors, and asthma in children. *Pediatr Pulmonol* 1999; 28: 59-70.
- 29 Marchant JM, Gibson PG, Grissell TV, Timmins NL, Masters IB, Chang AB. Prospective assessment of protracted bacterial bronchitis: airway inflammation and innate immune activation. *Pediatr Pulmonol* 2008; 43: 1092-1099.
- 30 Chang AB, Yerkovich ST, Gibson PG et al. Pulmonary innate immunity in children with protracted bacterial bronchitis. *J Pediatr* 2012; 161: 621-625.
- 31 Wurzel D, Marchant JM, Yerkovich ST, Upham JW, Mackay IM, Masters IB, Chang AB. Prospective characterisation of protracted bacterial bronchitis in children. *Chest* 2014; 145: 1271-1278.
- 32 Baines KJ, Upham JW, Yerkovich ST, Chang AB, Marchant JM, Carroll M, Simpson JL, Gibson PG. Mediators of neutrophil function in children with protracted bacterial bronchitis. *Chest* 2014; 146: 1013-1020.
- 33 Wurzel DF, Mackay IM, Marchant JM, Wang CY, Yerkovich ST, Upham JW, Smith-Vaughan HC, Petsky HL, Chang AB. Adenovirus Species C Is Associated With Chronic Suppurative Lung Diseases in Children. *Clin Infect Dis* 2014; 59: 34-40.
- 34 van der Gast CJ, Cuthbertson L, Rogers GB, Pope C, Marsh RL, Redding GJ, Bruce KD, Chang AB, Hoffman LR. Three Clinically Distinct Chronic Pediatric Airway Infections Share a Common Core Microbiota. *Ann Am Thorac Soc* 2014; 11: 1039-1048.

- 35 Chang AB, Newman RG, Carlin J, Phelan PD, Robertson CF. Subjective scoring of cough in children: parent-completed vs child-completed diary cards vs an objective method. *Eur Respir J* 1998; 11: 462-466.
- 36 Hodge S, Upham JW, Pizzutto SJ et al. Is alveolar macrophage phagocytic dysfunction in children with protracted bacterial bronchitis a forerunner to BE? *Chest* 2016; 149: 508-515.
- 37 Narang R, Bakewell K, Peach J, Clayton S, Samuels M, Alexander J, Lenney W, Gilchrist FJ. Bacterial distribution in the lungs of children with protracted bacterial bronchitis. *PLoS ONE* 2014; 9: e108523.
- 38 Priftis KN, Litt D, Mangani S et al. Bacterial bronchitis caused by *Streptococcus pneumoniae* and nontypable *Haemophilus influenzae* in children: the impact of vaccination. *Chest* 2013; 143: 152-157.
- 39 Goyal V, Grimwood K, Marchant JM, Masters IB, Chang AB. Does failed chronic wet cough response to ABs predict BE? *Arch Dis Child* 2014; 99: 522-525.
- 40 Rother AK, Schwerk N, Brinkmann F, Klawonn F, Lechner W, Grigull L. Diagnostic Support for Selected Paediatric Pulmonary Diseases Using Answer-Pattern Recognition in Questionnaires Based on Combined Data Mining Applications-A Monocentric Observational Pilot Study. *PLoS ONE* 2015; 10: e0135180.
- 41 Aluoch JA, Swai OB, Edwards EA, Stott H, Darbyshire JH, Fox W, Sutherland I. Study of case-finding for pulmonary tuberculosis in outpatients complaining of a chronic cough at a district hospital in Kenya. *Am Rev Respir Dis* 1984; 129: 915-920.
- 42 Chang AB, Eastburn MM, Gaffney J, Faoagali J, Cox NC, Masters IB. Cough quality in children: a comparison of subjective vs. bronchoscopic findings. *Respir Res* 2005; 6: 3.
- 43 Chang AB, Robertson CF, van Asperen PP, Glasgow NJ, Masters IB, Mellis CM, Landau LI, Teoh L, Morris PS. Can a management pathway for chronic cough in children improve clinical outcomes: protocol for a multicentre evaluation. *Trials* 2010; 11: 103.
- 44 Coren ME, Ng V, Rubens M, Rosenthal M, Bush A. The value of ultrafast computed tomography in the investigation of pediatric chest dis. *Pediatr Pulmonol* 1998; 26: 389-395.

- 45 De Baets F, De S, I, Aarts C, Haerynck F, Van DS, De WE, Malfroot A, Schelstraete P. Malacia, inflammation and bronchoalveolar lavage culture in children with persistent respiratory symptoms. *Eur Respir J* 2012; 39: 392-395.
- 46 Douros K, Alexopoulou E, Nicopoulou A, Anthracopoulos MB, Fretzayas A, Yiallourous P, Nicolaidou P, Priftis KN. Bronchoscopic and High Resolution CT Findings in Children with Chronic Wet Cough. *Chest* 2011; 140: 317-323.
- 47 Chang AB, Boyce NC, Masters IB, Torzillo PJ, Masel JP. Bronchoscopic findings in children with non-cystic fibrosis chronic suppurative lung dis. *Thorax* 2002; 57: 935-938.
- 48 Lim MT, Jeyarajah K, Jones P, Pandya H, Doffinger R, Kumararatne D, Browning MJ, Gaillard EA. Specific antibody deficiency in children with chronic wet cough. *Arch Dis Child* 2012; 97: 478-480.
- 49 Seear M, Wensley D. Chronic cough and wheeze in children: do they all have asthma? *Eur Respir J* 1997; 10: 342-345.
- 50 Braun L, Fausto-Sterling A, Fullwiley D, Hammonds EM, Nelson A, Quivers W, Reverby SM, Shields AE. Racial categories in medical practice: how useful are they? *PLoS Med* 2007; 4: e271.
- 51 Wurzel D, Marchant JM, Clark JE, Masters IB, Yerkovich ST, Upham JW, Chang AB. Wet cough in children: Infective and inflammatory characteristics in broncho-alveolar fluid. *Pediatr Pulmonol* 2014; 49: 561-568.
- 52 Zgherea D, Mendiratta M, Marcus MG, Shelov SP, Pagala S, Kazachkov M. Bronchoscopic findings in children with chronic wet cough. *Pediatrics* 2012; 129: e363-e369.
- 53 Chang AB, Faoagali J, Cox NC, Marchant JM, Dean B, Petsky HL, Masters IB. A bronchoscopic scoring system for airway secretions-airway cellularity and microbiological validation. *Pediatr Pulmonol* 2006; 41: 887-892.
- 54 Heino M, Juntunen-Backman K, Leijala M, Rapola J, Laitinen LA. Bronchial epithelial inflammation in children with chronic cough after early lower respiratory tract illness. *Am Rev Respir Dis* 1990; 141: 428-432.
- 55 Grissell T, Chang AB, Gibson PG. Impaired toll-like receptor 4 and substance P gene expression is linked to airway bacterial colonisation in children. *Pediatr Pulmonol* 2007; 42: 380-385.

- 56 Pizzutto SJ, Yerkovich ST, Upham JW, Hales BJ, Thomas WR, Chang AB. Children with Chronic Suppurative Lung Dis Have a Reduced Capacity to Synthesize Interferon-Gamma In Vitro in Response to Non-Typeable Haemophilus influenzae. *PLoS ONE* 2014; 9: e104236.
- 57 Thomson F, Masters IB, Chang AB. Persistent cough in children – overuse of medications. *J Paediatr Child Health* 2002; 38: 578-581.
- 58 Marchant JM, Masters IB, Taylor SM, Chang AB. Utility of signs and symptoms of chronic cough in predicting specific cause in children. *Thorax* 2006; 61: 694-698.
